# Supplementary material
Source: publisher site journal article supplement (https://www.spandidos-publications.com/7583/downloadSupplementary)
Supplement: Supplementary file 1 [file downloadSupplementary]

## Sheet: Table SXV
Table SXV. Immunocyte abundance in the training cohort (GSE185263) estimated by ssGSEA.
Sample	Group	Cell_type	Fraction
GSM5608946	sepsis	Activated B cell	0.562051
GSM5608946	sepsis	Activated CD4 T cell	0.621645
GSM5608946	sepsis	Activated CD8 T cell	0.836279
GSM5608946	sepsis	Central memory CD4 T cell	0.875163
GSM5608946	sepsis	Central memory CD8 T cell	0.461466
GSM5608946	sepsis	Effector memeory CD4 T cell	0.508329
GSM5608946	sepsis	Effector memeory CD8 T cell	0.718336
GSM5608946	sepsis	Gamma delta T cell	0.509397
GSM5608946	sepsis	Immature B cell	0.801471
GSM5608946	sepsis	Memory B cell	0.397648
GSM5608946	sepsis	Regulatory T cell	0.592169
GSM5608946	sepsis	T follicular helper cell	0.343708
GSM5608946	sepsis	Type 1 T helper cell	0.342312
GSM5608946	sepsis	Type 17 T helper cell	0
GSM5608946	sepsis	Type 2 T helper cell	0.113461
GSM5608946	sepsis	Activated dendritic cell	0.616863
GSM5608946	sepsis	CD56bright natural killer cell	0.44072
GSM5608946	sepsis	CD56dim natural killer cell	0.378356
GSM5608946	sepsis	Eosinophil	0.234441
GSM5608946	sepsis	Immature dendritic cell	0.641456
GSM5608946	sepsis	Macrophage	0.51799
GSM5608946	sepsis	Mast cell	0.513926
GSM5608946	sepsis	MDSC	1
GSM5608946	sepsis	Monocyte	0.874858
GSM5608946	sepsis	Natural killer cell	0.32594
GSM5608946	sepsis	Natural killer T cell	0.23003
GSM5608946	sepsis	Neutrophil	0.984927
GSM5608946	sepsis	Plasmacytoid dendritic cell	0.809622
GSM5608947	sepsis	Activated B cell	0.534933
GSM5608947	sepsis	Activated CD4 T cell	0.630589
GSM5608947	sepsis	Activated CD8 T cell	0.78503
GSM5608947	sepsis	Central memory CD4 T cell	0.829124
GSM5608947	sepsis	Central memory CD8 T cell	0.433731
GSM5608947	sepsis	Effector memeory CD4 T cell	0.407414
GSM5608947	sepsis	Effector memeory CD8 T cell	0.713077
GSM5608947	sepsis	Gamma delta T cell	0.515763
GSM5608947	sepsis	Immature B cell	0.797811
GSM5608947	sepsis	Memory B cell	0.357246
GSM5608947	sepsis	Regulatory T cell	0.520758
GSM5608947	sepsis	T follicular helper cell	0.303932
GSM5608947	sepsis	Type 1 T helper cell	0.378836
GSM5608947	sepsis	Type 17 T helper cell	0
GSM5608947	sepsis	Type 2 T helper cell	0.185246
GSM5608947	sepsis	Activated dendritic cell	0.662985
GSM5608947	sepsis	CD56bright natural killer cell	0.411669
GSM5608947	sepsis	CD56dim natural killer cell	0.300264
GSM5608947	sepsis	Eosinophil	0.277117
GSM5608947	sepsis	Immature dendritic cell	0.619727
GSM5608947	sepsis	Macrophage	0.579449
GSM5608947	sepsis	Mast cell	0.489265
GSM5608947	sepsis	MDSC	0.997108
GSM5608947	sepsis	Monocyte	0.819425
GSM5608947	sepsis	Natural killer cell	0.262483
GSM5608947	sepsis	Natural killer T cell	0.19726
GSM5608947	sepsis	Neutrophil	1
GSM5608947	sepsis	Plasmacytoid dendritic cell	0.79659
GSM5608948	sepsis	Activated B cell	0.41859
GSM5608948	sepsis	Activated CD4 T cell	0.545737
GSM5608948	sepsis	Activated CD8 T cell	0.835764
GSM5608948	sepsis	Central memory CD4 T cell	0.788096
GSM5608948	sepsis	Central memory CD8 T cell	0.44919
GSM5608948	sepsis	Effector memeory CD4 T cell	0.344428
GSM5608948	sepsis	Effector memeory CD8 T cell	0.690899
GSM5608948	sepsis	Gamma delta T cell	0.500147
GSM5608948	sepsis	Immature B cell	0.741948
GSM5608948	sepsis	Memory B cell	0.222009
GSM5608948	sepsis	Regulatory T cell	0.554972
GSM5608948	sepsis	T follicular helper cell	0.431039
GSM5608948	sepsis	Type 1 T helper cell	0.378953
GSM5608948	sepsis	Type 17 T helper cell	0
GSM5608948	sepsis	Type 2 T helper cell	0.136917
GSM5608948	sepsis	Activated dendritic cell	0.567993
GSM5608948	sepsis	CD56bright natural killer cell	0.40818
GSM5608948	sepsis	CD56dim natural killer cell	0.174916
GSM5608948	sepsis	Eosinophil	0.222207
GSM5608948	sepsis	Immature dendritic cell	0.567582
GSM5608948	sepsis	Macrophage	0.418848
GSM5608948	sepsis	Mast cell	0.266852
GSM5608948	sepsis	MDSC	0.990669
GSM5608948	sepsis	Monocyte	0.713634
GSM5608948	sepsis	Natural killer cell	0.376011
GSM5608948	sepsis	Natural killer T cell	0.274157
GSM5608948	sepsis	Neutrophil	1
GSM5608948	sepsis	Plasmacytoid dendritic cell	0.709755
GSM5608949	sepsis	Activated B cell	0.585906
GSM5608949	sepsis	Activated CD4 T cell	0.505935
GSM5608949	sepsis	Activated CD8 T cell	0.814294
GSM5608949	sepsis	Central memory CD4 T cell	0.831844
GSM5608949	sepsis	Central memory CD8 T cell	0.432414
GSM5608949	sepsis	Effector memeory CD4 T cell	0.398296
GSM5608949	sepsis	Effector memeory CD8 T cell	0.727972
GSM5608949	sepsis	Gamma delta T cell	0.460353
GSM5608949	sepsis	Immature B cell	0.861442
GSM5608949	sepsis	Memory B cell	0.283567
GSM5608949	sepsis	Regulatory T cell	0.53513
GSM5608949	sepsis	T follicular helper cell	0.382655
GSM5608949	sepsis	Type 1 T helper cell	0.305272
GSM5608949	sepsis	Type 17 T helper cell	0
GSM5608949	sepsis	Type 2 T helper cell	0.075565
GSM5608949	sepsis	Activated dendritic cell	0.589216
GSM5608949	sepsis	CD56bright natural killer cell	0.423806
GSM5608949	sepsis	CD56dim natural killer cell	0.350376
GSM5608949	sepsis	Eosinophil	0.37095
GSM5608949	sepsis	Immature dendritic cell	0.610674
GSM5608949	sepsis	Macrophage	0.49149
GSM5608949	sepsis	Mast cell	0.452591
GSM5608949	sepsis	MDSC	0.979767
GSM5608949	sepsis	Monocyte	0.793445
GSM5608949	sepsis	Natural killer cell	0.300568
GSM5608949	sepsis	Natural killer T cell	0.292457
GSM5608949	sepsis	Neutrophil	1
GSM5608949	sepsis	Plasmacytoid dendritic cell	0.77661
GSM5608950	sepsis	Activated B cell	0.511457
GSM5608950	sepsis	Activated CD4 T cell	0.492573
GSM5608950	sepsis	Activated CD8 T cell	0.818525
GSM5608950	sepsis	Central memory CD4 T cell	0.832591
GSM5608950	sepsis	Central memory CD8 T cell	0.405718
GSM5608950	sepsis	Effector memeory CD4 T cell	0.410965
GSM5608950	sepsis	Effector memeory CD8 T cell	0.76374
GSM5608950	sepsis	Gamma delta T cell	0.458324
GSM5608950	sepsis	Immature B cell	0.838203
GSM5608950	sepsis	Memory B cell	0.320822
GSM5608950	sepsis	Regulatory T cell	0.505156
GSM5608950	sepsis	T follicular helper cell	0.310251
GSM5608950	sepsis	Type 1 T helper cell	0.279069
GSM5608950	sepsis	Type 17 T helper cell	0
GSM5608950	sepsis	Type 2 T helper cell	0.0810139
GSM5608950	sepsis	Activated dendritic cell	0.604321
GSM5608950	sepsis	CD56bright natural killer cell	0.421853
GSM5608950	sepsis	CD56dim natural killer cell	0.278442
GSM5608950	sepsis	Eosinophil	0.25122
GSM5608950	sepsis	Immature dendritic cell	0.54948
GSM5608950	sepsis	Macrophage	0.532408
GSM5608950	sepsis	Mast cell	0.310401
GSM5608950	sepsis	MDSC	1
GSM5608950	sepsis	Monocyte	0.822096
GSM5608950	sepsis	Natural killer cell	0.262859
GSM5608950	sepsis	Natural killer T cell	0.175457
GSM5608950	sepsis	Neutrophil	0.941548
GSM5608950	sepsis	Plasmacytoid dendritic cell	0.736593
GSM5608951	sepsis	Activated B cell	0.621863
GSM5608951	sepsis	Activated CD4 T cell	0.512351
GSM5608951	sepsis	Activated CD8 T cell	0.829926
GSM5608951	sepsis	Central memory CD4 T cell	0.796722
GSM5608951	sepsis	Central memory CD8 T cell	0.277438
GSM5608951	sepsis	Effector memeory CD4 T cell	0.39723
GSM5608951	sepsis	Effector memeory CD8 T cell	0.775759
GSM5608951	sepsis	Gamma delta T cell	0.301197
GSM5608951	sepsis	Immature B cell	1
GSM5608951	sepsis	Memory B cell	0.421508
GSM5608951	sepsis	Regulatory T cell	0.241712
GSM5608951	sepsis	T follicular helper cell	0.312751
GSM5608951	sepsis	Type 1 T helper cell	0.288424
GSM5608951	sepsis	Type 17 T helper cell	0
GSM5608951	sepsis	Type 2 T helper cell	0.0640984
GSM5608951	sepsis	Activated dendritic cell	0.36608
GSM5608951	sepsis	CD56bright natural killer cell	0.375493
GSM5608951	sepsis	CD56dim natural killer cell	0.388462
GSM5608951	sepsis	Eosinophil	0.286212
GSM5608951	sepsis	Immature dendritic cell	0.410377
GSM5608951	sepsis	Macrophage	0.200455
GSM5608951	sepsis	Mast cell	0.0393964
GSM5608951	sepsis	MDSC	0.885899
GSM5608951	sepsis	Monocyte	0.471239
GSM5608951	sepsis	Natural killer cell	0.20472
GSM5608951	sepsis	Natural killer T cell	0.23384
GSM5608951	sepsis	Neutrophil	0.297471
GSM5608951	sepsis	Plasmacytoid dendritic cell	0.632682
GSM5608952	sepsis	Activated B cell	0.471741
GSM5608952	sepsis	Activated CD4 T cell	0.75944
GSM5608952	sepsis	Activated CD8 T cell	0.897975
GSM5608952	sepsis	Central memory CD4 T cell	0.871117
GSM5608952	sepsis	Central memory CD8 T cell	0.497004
GSM5608952	sepsis	Effector memeory CD4 T cell	0.350723
GSM5608952	sepsis	Effector memeory CD8 T cell	0.773131
GSM5608952	sepsis	Gamma delta T cell	0.510677
GSM5608952	sepsis	Immature B cell	0.779118
GSM5608952	sepsis	Memory B cell	0.308238
GSM5608952	sepsis	Regulatory T cell	0.585752
GSM5608952	sepsis	T follicular helper cell	0.357728
GSM5608952	sepsis	Type 1 T helper cell	0.405626
GSM5608952	sepsis	Type 17 T helper cell	0
GSM5608952	sepsis	Type 2 T helper cell	0.249803
GSM5608952	sepsis	Activated dendritic cell	0.549624
GSM5608952	sepsis	CD56bright natural killer cell	0.375172
GSM5608952	sepsis	CD56dim natural killer cell	0.403658
GSM5608952	sepsis	Eosinophil	0.349821
GSM5608952	sepsis	Immature dendritic cell	0.610777
GSM5608952	sepsis	Macrophage	0.506299
GSM5608952	sepsis	Mast cell	0.242741
GSM5608952	sepsis	MDSC	1
GSM5608952	sepsis	Monocyte	0.82968
GSM5608952	sepsis	Natural killer cell	0.307164
GSM5608952	sepsis	Natural killer T cell	0.276332
GSM5608952	sepsis	Neutrophil	0.802733
GSM5608952	sepsis	Plasmacytoid dendritic cell	0.715209
GSM5608953	sepsis	Activated B cell	0.466352
GSM5608953	sepsis	Activated CD4 T cell	0.543532
GSM5608953	sepsis	Activated CD8 T cell	0.777876
GSM5608953	sepsis	Central memory CD4 T cell	0.770106
GSM5608953	sepsis	Central memory CD8 T cell	0.379138
GSM5608953	sepsis	Effector memeory CD4 T cell	0.313346
GSM5608953	sepsis	Effector memeory CD8 T cell	0.658441
GSM5608953	sepsis	Gamma delta T cell	0.449227
GSM5608953	sepsis	Immature B cell	0.81032
GSM5608953	sepsis	Memory B cell	0.248704
GSM5608953	sepsis	Regulatory T cell	0.530414
GSM5608953	sepsis	T follicular helper cell	0.337782
GSM5608953	sepsis	Type 1 T helper cell	0.30419
GSM5608953	sepsis	Type 17 T helper cell	0
GSM5608953	sepsis	Type 2 T helper cell	0.11829
GSM5608953	sepsis	Activated dendritic cell	0.550705
GSM5608953	sepsis	CD56bright natural killer cell	0.46617
GSM5608953	sepsis	CD56dim natural killer cell	0.23647
GSM5608953	sepsis	Eosinophil	0.386255
GSM5608953	sepsis	Immature dendritic cell	0.602219
GSM5608953	sepsis	Macrophage	0.439173
GSM5608953	sepsis	Mast cell	0.42624
GSM5608953	sepsis	MDSC	0.967768
GSM5608953	sepsis	Monocyte	0.729599
GSM5608953	sepsis	Natural killer cell	0.352868
GSM5608953	sepsis	Natural killer T cell	0.2714
GSM5608953	sepsis	Neutrophil	1
GSM5608953	sepsis	Plasmacytoid dendritic cell	0.715744
GSM5608954	sepsis	Activated B cell	0.466668
GSM5608954	sepsis	Activated CD4 T cell	0.459087
GSM5608954	sepsis	Activated CD8 T cell	0.677705
GSM5608954	sepsis	Central memory CD4 T cell	0.76975
GSM5608954	sepsis	Central memory CD8 T cell	0.394254
GSM5608954	sepsis	Effector memeory CD4 T cell	0.434834
GSM5608954	sepsis	Effector memeory CD8 T cell	0.649311
GSM5608954	sepsis	Gamma delta T cell	0.474375
GSM5608954	sepsis	Immature B cell	0.762445
GSM5608954	sepsis	Memory B cell	0.211956
GSM5608954	sepsis	Regulatory T cell	0.562097
GSM5608954	sepsis	T follicular helper cell	0.331557
GSM5608954	sepsis	Type 1 T helper cell	0.300945
GSM5608954	sepsis	Type 17 T helper cell	0
GSM5608954	sepsis	Type 2 T helper cell	0.0250447
GSM5608954	sepsis	Activated dendritic cell	0.625694
GSM5608954	sepsis	CD56bright natural killer cell	0.476703
GSM5608954	sepsis	CD56dim natural killer cell	0.323338
GSM5608954	sepsis	Eosinophil	0.303222
GSM5608954	sepsis	Immature dendritic cell	0.65955
GSM5608954	sepsis	Macrophage	0.475545
GSM5608954	sepsis	Mast cell	0.540684
GSM5608954	sepsis	MDSC	0.964214
GSM5608954	sepsis	Monocyte	0.769125
GSM5608954	sepsis	Natural killer cell	0.285641
GSM5608954	sepsis	Natural killer T cell	0.152983
GSM5608954	sepsis	Neutrophil	1
GSM5608954	sepsis	Plasmacytoid dendritic cell	0.758709
GSM5608955	sepsis	Activated B cell	0.625958
GSM5608955	sepsis	Activated CD4 T cell	0.508008
GSM5608955	sepsis	Activated CD8 T cell	0.836366
GSM5608955	sepsis	Central memory CD4 T cell	0.813696
GSM5608955	sepsis	Central memory CD8 T cell	0.435194
GSM5608955	sepsis	Effector memeory CD4 T cell	0.384551
GSM5608955	sepsis	Effector memeory CD8 T cell	0.773125
GSM5608955	sepsis	Gamma delta T cell	0.437547
GSM5608955	sepsis	Immature B cell	0.908241
GSM5608955	sepsis	Memory B cell	0.324612
GSM5608955	sepsis	Regulatory T cell	0.484292
GSM5608955	sepsis	T follicular helper cell	0.37966
GSM5608955	sepsis	Type 1 T helper cell	0.344288
GSM5608955	sepsis	Type 17 T helper cell	0
GSM5608955	sepsis	Type 2 T helper cell	0.169147
GSM5608955	sepsis	Activated dendritic cell	0.610322
GSM5608955	sepsis	CD56bright natural killer cell	0.410484
GSM5608955	sepsis	CD56dim natural killer cell	0.311462
GSM5608955	sepsis	Eosinophil	0.378031
GSM5608955	sepsis	Immature dendritic cell	0.565898
GSM5608955	sepsis	Macrophage	0.5338
GSM5608955	sepsis	Mast cell	0.33497
GSM5608955	sepsis	MDSC	0.996847
GSM5608955	sepsis	Monocyte	0.691821
GSM5608955	sepsis	Natural killer cell	0.397212
GSM5608955	sepsis	Natural killer T cell	0.256001
GSM5608955	sepsis	Neutrophil	1
GSM5608955	sepsis	Plasmacytoid dendritic cell	0.749437
GSM5608956	sepsis	Activated B cell	0.47562
GSM5608956	sepsis	Activated CD4 T cell	0.400639
GSM5608956	sepsis	Activated CD8 T cell	0.744767
GSM5608956	sepsis	Central memory CD4 T cell	0.83684
GSM5608956	sepsis	Central memory CD8 T cell	0.389338
GSM5608956	sepsis	Effector memeory CD4 T cell	0.381511
GSM5608956	sepsis	Effector memeory CD8 T cell	0.705494
GSM5608956	sepsis	Gamma delta T cell	0.505035
GSM5608956	sepsis	Immature B cell	0.743579
GSM5608956	sepsis	Memory B cell	0.105465
GSM5608956	sepsis	Regulatory T cell	0.573879
GSM5608956	sepsis	T follicular helper cell	0.411658
GSM5608956	sepsis	Type 1 T helper cell	0.383755
GSM5608956	sepsis	Type 17 T helper cell	0
GSM5608956	sepsis	Type 2 T helper cell	0.192424
GSM5608956	sepsis	Activated dendritic cell	0.664878
GSM5608956	sepsis	CD56bright natural killer cell	0.447909
GSM5608956	sepsis	CD56dim natural killer cell	0.354121
GSM5608956	sepsis	Eosinophil	0.368382
GSM5608956	sepsis	Immature dendritic cell	0.562316
GSM5608956	sepsis	Macrophage	0.559516
GSM5608956	sepsis	Mast cell	0.449307
GSM5608956	sepsis	MDSC	0.982402
GSM5608956	sepsis	Monocyte	0.74384
GSM5608956	sepsis	Natural killer cell	0.408348
GSM5608956	sepsis	Natural killer T cell	0.222595
GSM5608956	sepsis	Neutrophil	1
GSM5608956	sepsis	Plasmacytoid dendritic cell	0.753455
GSM5608957	sepsis	Activated B cell	0.440126
GSM5608957	sepsis	Activated CD4 T cell	0.654178
GSM5608957	sepsis	Activated CD8 T cell	0.799102
GSM5608957	sepsis	Central memory CD4 T cell	0.839549
GSM5608957	sepsis	Central memory CD8 T cell	0.49239
GSM5608957	sepsis	Effector memeory CD4 T cell	0.257961
GSM5608957	sepsis	Effector memeory CD8 T cell	0.759273
GSM5608957	sepsis	Gamma delta T cell	0.452705
GSM5608957	sepsis	Immature B cell	0.791896
GSM5608957	sepsis	Memory B cell	0.208885
GSM5608957	sepsis	Regulatory T cell	0.529331
GSM5608957	sepsis	T follicular helper cell	0.3408
GSM5608957	sepsis	Type 1 T helper cell	0.378895
GSM5608957	sepsis	Type 17 T helper cell	0
GSM5608957	sepsis	Type 2 T helper cell	0.231245
GSM5608957	sepsis	Activated dendritic cell	0.637125
GSM5608957	sepsis	CD56bright natural killer cell	0.354785
GSM5608957	sepsis	CD56dim natural killer cell	0.375374
GSM5608957	sepsis	Eosinophil	0.241551
GSM5608957	sepsis	Immature dendritic cell	0.568511
GSM5608957	sepsis	Macrophage	0.441457
GSM5608957	sepsis	Mast cell	0.43899
GSM5608957	sepsis	MDSC	1
GSM5608957	sepsis	Monocyte	0.813685
GSM5608957	sepsis	Natural killer cell	0.306214
GSM5608957	sepsis	Natural killer T cell	0.28412
GSM5608957	sepsis	Neutrophil	0.852835
GSM5608957	sepsis	Plasmacytoid dendritic cell	0.719862
GSM5608958	sepsis	Activated B cell	0.557172
GSM5608958	sepsis	Activated CD4 T cell	0.615133
GSM5608958	sepsis	Activated CD8 T cell	0.909409
GSM5608958	sepsis	Central memory CD4 T cell	0.877601
GSM5608958	sepsis	Central memory CD8 T cell	0.393977
GSM5608958	sepsis	Effector memeory CD4 T cell	0.461856
GSM5608958	sepsis	Effector memeory CD8 T cell	0.831145
GSM5608958	sepsis	Gamma delta T cell	0.524816
GSM5608958	sepsis	Immature B cell	0.874358
GSM5608958	sepsis	Memory B cell	0.270038
GSM5608958	sepsis	Regulatory T cell	0.567225
GSM5608958	sepsis	T follicular helper cell	0.443516
GSM5608958	sepsis	Type 1 T helper cell	0.447926
GSM5608958	sepsis	Type 17 T helper cell	0
GSM5608958	sepsis	Type 2 T helper cell	0.271709
GSM5608958	sepsis	Activated dendritic cell	0.694183
GSM5608958	sepsis	CD56bright natural killer cell	0.478578
GSM5608958	sepsis	CD56dim natural killer cell	0.436609
GSM5608958	sepsis	Eosinophil	0.358722
GSM5608958	sepsis	Immature dendritic cell	0.645455
GSM5608958	sepsis	Macrophage	0.566894
GSM5608958	sepsis	Mast cell	0.498424
GSM5608958	sepsis	MDSC	1
GSM5608958	sepsis	Monocyte	0.815674
GSM5608958	sepsis	Natural killer cell	0.385533
GSM5608958	sepsis	Natural killer T cell	0.308374
GSM5608958	sepsis	Neutrophil	0.977423
GSM5608958	sepsis	Plasmacytoid dendritic cell	0.747977
GSM5608959	sepsis	Activated B cell	0.369445
GSM5608959	sepsis	Activated CD4 T cell	0.659266
GSM5608959	sepsis	Activated CD8 T cell	0.875651
GSM5608959	sepsis	Central memory CD4 T cell	0.836621
GSM5608959	sepsis	Central memory CD8 T cell	0.360826
GSM5608959	sepsis	Effector memeory CD4 T cell	0.377927
GSM5608959	sepsis	Effector memeory CD8 T cell	0.840291
GSM5608959	sepsis	Gamma delta T cell	0.543456
GSM5608959	sepsis	Immature B cell	0.749838
GSM5608959	sepsis	Memory B cell	0.160783
GSM5608959	sepsis	Regulatory T cell	0.547089
GSM5608959	sepsis	T follicular helper cell	0.339555
GSM5608959	sepsis	Type 1 T helper cell	0.354315
GSM5608959	sepsis	Type 17 T helper cell	0
GSM5608959	sepsis	Type 2 T helper cell	0.266241
GSM5608959	sepsis	Activated dendritic cell	0.650095
GSM5608959	sepsis	CD56bright natural killer cell	0.456169
GSM5608959	sepsis	CD56dim natural killer cell	0.382179
GSM5608959	sepsis	Eosinophil	0.209685
GSM5608959	sepsis	Immature dendritic cell	0.594397
GSM5608959	sepsis	Macrophage	0.39254
GSM5608959	sepsis	Mast cell	0.351512
GSM5608959	sepsis	MDSC	1
GSM5608959	sepsis	Monocyte	0.813618
GSM5608959	sepsis	Natural killer cell	0.343932
GSM5608959	sepsis	Natural killer T cell	0.177015
GSM5608959	sepsis	Neutrophil	0.879747
GSM5608959	sepsis	Plasmacytoid dendritic cell	0.708673
GSM5608960	sepsis	Activated B cell	0.322065
GSM5608960	sepsis	Activated CD4 T cell	0.508609
GSM5608960	sepsis	Activated CD8 T cell	0.755383
GSM5608960	sepsis	Central memory CD4 T cell	0.746371
GSM5608960	sepsis	Central memory CD8 T cell	0.328165
GSM5608960	sepsis	Effector memeory CD4 T cell	0.223821
GSM5608960	sepsis	Effector memeory CD8 T cell	0.656414
GSM5608960	sepsis	Gamma delta T cell	0.416833
GSM5608960	sepsis	Immature B cell	0.749891
GSM5608960	sepsis	Memory B cell	0.303545
GSM5608960	sepsis	Regulatory T cell	0.430995
GSM5608960	sepsis	T follicular helper cell	0.250576
GSM5608960	sepsis	Type 1 T helper cell	0.249511
GSM5608960	sepsis	Type 17 T helper cell	0
GSM5608960	sepsis	Type 2 T helper cell	0.0801279
GSM5608960	sepsis	Activated dendritic cell	0.615367
GSM5608960	sepsis	CD56bright natural killer cell	0.346794
GSM5608960	sepsis	CD56dim natural killer cell	0.214207
GSM5608960	sepsis	Eosinophil	0.322026
GSM5608960	sepsis	Immature dendritic cell	0.535961
GSM5608960	sepsis	Macrophage	0.323756
GSM5608960	sepsis	Mast cell	0.26861
GSM5608960	sepsis	MDSC	0.956108
GSM5608960	sepsis	Monocyte	0.625654
GSM5608960	sepsis	Natural killer cell	0.234754
GSM5608960	sepsis	Natural killer T cell	0.186901
GSM5608960	sepsis	Neutrophil	1
GSM5608960	sepsis	Plasmacytoid dendritic cell	0.689138
GSM5608961	sepsis	Activated B cell	0.606104
GSM5608961	sepsis	Activated CD4 T cell	0.595718
GSM5608961	sepsis	Activated CD8 T cell	0.889714
GSM5608961	sepsis	Central memory CD4 T cell	0.848654
GSM5608961	sepsis	Central memory CD8 T cell	0.396525
GSM5608961	sepsis	Effector memeory CD4 T cell	0.374804
GSM5608961	sepsis	Effector memeory CD8 T cell	0.767287
GSM5608961	sepsis	Gamma delta T cell	0.424297
GSM5608961	sepsis	Immature B cell	0.889393
GSM5608961	sepsis	Memory B cell	0.296269
GSM5608961	sepsis	Regulatory T cell	0.49119
GSM5608961	sepsis	T follicular helper cell	0.338939
GSM5608961	sepsis	Type 1 T helper cell	0.37028
GSM5608961	sepsis	Type 17 T helper cell	0
GSM5608961	sepsis	Type 2 T helper cell	0.064905
GSM5608961	sepsis	Activated dendritic cell	0.475923
GSM5608961	sepsis	CD56bright natural killer cell	0.448918
GSM5608961	sepsis	CD56dim natural killer cell	0.286164
GSM5608961	sepsis	Eosinophil	0.367617
GSM5608961	sepsis	Immature dendritic cell	0.594445
GSM5608961	sepsis	Macrophage	0.538259
GSM5608961	sepsis	Mast cell	0.334716
GSM5608961	sepsis	MDSC	1
GSM5608961	sepsis	Monocyte	0.841667
GSM5608961	sepsis	Natural killer cell	0.317691
GSM5608961	sepsis	Natural killer T cell	0.187211
GSM5608961	sepsis	Neutrophil	0.98362
GSM5608961	sepsis	Plasmacytoid dendritic cell	0.747964
GSM5608962	sepsis	Activated B cell	0.386493
GSM5608962	sepsis	Activated CD4 T cell	0.567493
GSM5608962	sepsis	Activated CD8 T cell	0.86958
GSM5608962	sepsis	Central memory CD4 T cell	0.843119
GSM5608962	sepsis	Central memory CD8 T cell	0.469064
GSM5608962	sepsis	Effector memeory CD4 T cell	0.450115
GSM5608962	sepsis	Effector memeory CD8 T cell	0.818365
GSM5608962	sepsis	Gamma delta T cell	0.460996
GSM5608962	sepsis	Immature B cell	0.73561
GSM5608962	sepsis	Memory B cell	0.0720127
GSM5608962	sepsis	Regulatory T cell	0.517015
GSM5608962	sepsis	T follicular helper cell	0.391551
GSM5608962	sepsis	Type 1 T helper cell	0.347893
GSM5608962	sepsis	Type 17 T helper cell	0
GSM5608962	sepsis	Type 2 T helper cell	0.17859
GSM5608962	sepsis	Activated dendritic cell	0.605291
GSM5608962	sepsis	CD56bright natural killer cell	0.448412
GSM5608962	sepsis	CD56dim natural killer cell	0.338895
GSM5608962	sepsis	Eosinophil	0.35576
GSM5608962	sepsis	Immature dendritic cell	0.571111
GSM5608962	sepsis	Macrophage	0.484543
GSM5608962	sepsis	Mast cell	0.412249
GSM5608962	sepsis	MDSC	1
GSM5608962	sepsis	Monocyte	0.825345
GSM5608962	sepsis	Natural killer cell	0.26832
GSM5608962	sepsis	Natural killer T cell	0.266291
GSM5608962	sepsis	Neutrophil	0.850854
GSM5608962	sepsis	Plasmacytoid dendritic cell	0.726264
GSM5608963	sepsis	Activated B cell	0.62162
GSM5608963	sepsis	Activated CD4 T cell	0.533899
GSM5608963	sepsis	Activated CD8 T cell	0.851735
GSM5608963	sepsis	Central memory CD4 T cell	0.86254
GSM5608963	sepsis	Central memory CD8 T cell	0.474608
GSM5608963	sepsis	Effector memeory CD4 T cell	0.396597
GSM5608963	sepsis	Effector memeory CD8 T cell	0.789707
GSM5608963	sepsis	Gamma delta T cell	0.455688
GSM5608963	sepsis	Immature B cell	0.877669
GSM5608963	sepsis	Memory B cell	0.295291
GSM5608963	sepsis	Regulatory T cell	0.57303
GSM5608963	sepsis	T follicular helper cell	0.381506
GSM5608963	sepsis	Type 1 T helper cell	0.408475
GSM5608963	sepsis	Type 17 T helper cell	0
GSM5608963	sepsis	Type 2 T helper cell	0.10132
GSM5608963	sepsis	Activated dendritic cell	0.640102
GSM5608963	sepsis	CD56bright natural killer cell	0.467524
GSM5608963	sepsis	CD56dim natural killer cell	0.367371
GSM5608963	sepsis	Eosinophil	0.330808
GSM5608963	sepsis	Immature dendritic cell	0.605572
GSM5608963	sepsis	Macrophage	0.474402
GSM5608963	sepsis	Mast cell	0.363998
GSM5608963	sepsis	MDSC	1
GSM5608963	sepsis	Monocyte	0.79358
GSM5608963	sepsis	Natural killer cell	0.380569
GSM5608963	sepsis	Natural killer T cell	0.2743
GSM5608963	sepsis	Neutrophil	0.955094
GSM5608963	sepsis	Plasmacytoid dendritic cell	0.772673
GSM5608964	sepsis	Activated B cell	0.526652
GSM5608964	sepsis	Activated CD4 T cell	0.719605
GSM5608964	sepsis	Activated CD8 T cell	0.879868
GSM5608964	sepsis	Central memory CD4 T cell	0.846907
GSM5608964	sepsis	Central memory CD8 T cell	0.522971
GSM5608964	sepsis	Effector memeory CD4 T cell	0.312404
GSM5608964	sepsis	Effector memeory CD8 T cell	0.840483
GSM5608964	sepsis	Gamma delta T cell	0.495551
GSM5608964	sepsis	Immature B cell	0.84621
GSM5608964	sepsis	Memory B cell	0.379703
GSM5608964	sepsis	Regulatory T cell	0.590933
GSM5608964	sepsis	T follicular helper cell	0.436813
GSM5608964	sepsis	Type 1 T helper cell	0.435292
GSM5608964	sepsis	Type 17 T helper cell	0
GSM5608964	sepsis	Type 2 T helper cell	0.315343
GSM5608964	sepsis	Activated dendritic cell	0.571617
GSM5608964	sepsis	CD56bright natural killer cell	0.497763
GSM5608964	sepsis	CD56dim natural killer cell	0.398614
GSM5608964	sepsis	Eosinophil	0.241671
GSM5608964	sepsis	Immature dendritic cell	0.558831
GSM5608964	sepsis	Macrophage	0.458096
GSM5608964	sepsis	Mast cell	0.309699
GSM5608964	sepsis	MDSC	1
GSM5608964	sepsis	Monocyte	0.815467
GSM5608964	sepsis	Natural killer cell	0.37163
GSM5608964	sepsis	Natural killer T cell	0.297401
GSM5608964	sepsis	Neutrophil	0.887717
GSM5608964	sepsis	Plasmacytoid dendritic cell	0.735825
GSM5608965	sepsis	Activated B cell	0.593047
GSM5608965	sepsis	Activated CD4 T cell	0.658946
GSM5608965	sepsis	Activated CD8 T cell	0.885798
GSM5608965	sepsis	Central memory CD4 T cell	0.833884
GSM5608965	sepsis	Central memory CD8 T cell	0.360457
GSM5608965	sepsis	Effector memeory CD4 T cell	0.393412
GSM5608965	sepsis	Effector memeory CD8 T cell	0.794318
GSM5608965	sepsis	Gamma delta T cell	0.448733
GSM5608965	sepsis	Immature B cell	0.885257
GSM5608965	sepsis	Memory B cell	0.31279
GSM5608965	sepsis	Regulatory T cell	0.565168
GSM5608965	sepsis	T follicular helper cell	0.340746
GSM5608965	sepsis	Type 1 T helper cell	0.29092
GSM5608965	sepsis	Type 17 T helper cell	0
GSM5608965	sepsis	Type 2 T helper cell	0.128581
GSM5608965	sepsis	Activated dendritic cell	0.616117
GSM5608965	sepsis	CD56bright natural killer cell	0.373897
GSM5608965	sepsis	CD56dim natural killer cell	0.33087
GSM5608965	sepsis	Eosinophil	0.274513
GSM5608965	sepsis	Immature dendritic cell	0.531593
GSM5608965	sepsis	Macrophage	0.472483
GSM5608965	sepsis	Mast cell	0.363253
GSM5608965	sepsis	MDSC	1
GSM5608965	sepsis	Monocyte	0.791821
GSM5608965	sepsis	Natural killer cell	0.360011
GSM5608965	sepsis	Natural killer T cell	0.283342
GSM5608965	sepsis	Neutrophil	0.94917
GSM5608965	sepsis	Plasmacytoid dendritic cell	0.73534
GSM5608966	sepsis	Activated B cell	0.516806
GSM5608966	sepsis	Activated CD4 T cell	0.455416
GSM5608966	sepsis	Activated CD8 T cell	0.824443
GSM5608966	sepsis	Central memory CD4 T cell	0.830868
GSM5608966	sepsis	Central memory CD8 T cell	0.533938
GSM5608966	sepsis	Effector memeory CD4 T cell	0.493561
GSM5608966	sepsis	Effector memeory CD8 T cell	0.77414
GSM5608966	sepsis	Gamma delta T cell	0.58472
GSM5608966	sepsis	Immature B cell	0.826243
GSM5608966	sepsis	Memory B cell	0.309102
GSM5608966	sepsis	Regulatory T cell	0.630387
GSM5608966	sepsis	T follicular helper cell	0.459618
GSM5608966	sepsis	Type 1 T helper cell	0.382427
GSM5608966	sepsis	Type 17 T helper cell	0
GSM5608966	sepsis	Type 2 T helper cell	0.072343
GSM5608966	sepsis	Activated dendritic cell	0.60985
GSM5608966	sepsis	CD56bright natural killer cell	0.514222
GSM5608966	sepsis	CD56dim natural killer cell	0.423938
GSM5608966	sepsis	Eosinophil	0.348633
GSM5608966	sepsis	Immature dendritic cell	0.697865
GSM5608966	sepsis	Macrophage	0.598814
GSM5608966	sepsis	Mast cell	0.654192
GSM5608966	sepsis	MDSC	0.985296
GSM5608966	sepsis	Monocyte	0.797743
GSM5608966	sepsis	Natural killer cell	0.424311
GSM5608966	sepsis	Natural killer T cell	0.310159
GSM5608966	sepsis	Neutrophil	1
GSM5608966	sepsis	Plasmacytoid dendritic cell	0.807003
GSM5608967	sepsis	Activated B cell	0.55278
GSM5608967	sepsis	Activated CD4 T cell	0.571133
GSM5608967	sepsis	Activated CD8 T cell	0.864124
GSM5608967	sepsis	Central memory CD4 T cell	0.882627
GSM5608967	sepsis	Central memory CD8 T cell	0.506854
GSM5608967	sepsis	Effector memeory CD4 T cell	0.506646
GSM5608967	sepsis	Effector memeory CD8 T cell	0.803107
GSM5608967	sepsis	Gamma delta T cell	0.487249
GSM5608967	sepsis	Immature B cell	0.822395
GSM5608967	sepsis	Memory B cell	0.421111
GSM5608967	sepsis	Regulatory T cell	0.571229
GSM5608967	sepsis	T follicular helper cell	0.392633
GSM5608967	sepsis	Type 1 T helper cell	0.420278
GSM5608967	sepsis	Type 17 T helper cell	0
GSM5608967	sepsis	Type 2 T helper cell	0.169633
GSM5608967	sepsis	Activated dendritic cell	0.642813
GSM5608967	sepsis	CD56bright natural killer cell	0.529325
GSM5608967	sepsis	CD56dim natural killer cell	0.331822
GSM5608967	sepsis	Eosinophil	0.474495
GSM5608967	sepsis	Immature dendritic cell	0.617822
GSM5608967	sepsis	Macrophage	0.577856
GSM5608967	sepsis	Mast cell	0.463605
GSM5608967	sepsis	MDSC	1
GSM5608967	sepsis	Monocyte	0.745426
GSM5608967	sepsis	Natural killer cell	0.389725
GSM5608967	sepsis	Natural killer T cell	0.333309
GSM5608967	sepsis	Neutrophil	0.952301
GSM5608967	sepsis	Plasmacytoid dendritic cell	0.759086
GSM5608968	sepsis	Activated B cell	0.521074
GSM5608968	sepsis	Activated CD4 T cell	0.561644
GSM5608968	sepsis	Activated CD8 T cell	0.861663
GSM5608968	sepsis	Central memory CD4 T cell	0.864471
GSM5608968	sepsis	Central memory CD8 T cell	0.49323
GSM5608968	sepsis	Effector memeory CD4 T cell	0.337376
GSM5608968	sepsis	Effector memeory CD8 T cell	0.808129
GSM5608968	sepsis	Gamma delta T cell	0.461649
GSM5608968	sepsis	Immature B cell	0.798047
GSM5608968	sepsis	Memory B cell	0.427679
GSM5608968	sepsis	Regulatory T cell	0.531984
GSM5608968	sepsis	T follicular helper cell	0.376361
GSM5608968	sepsis	Type 1 T helper cell	0.409659
GSM5608968	sepsis	Type 17 T helper cell	0
GSM5608968	sepsis	Type 2 T helper cell	0.168021
GSM5608968	sepsis	Activated dendritic cell	0.587878
GSM5608968	sepsis	CD56bright natural killer cell	0.411023
GSM5608968	sepsis	CD56dim natural killer cell	0.399387
GSM5608968	sepsis	Eosinophil	0.375282
GSM5608968	sepsis	Immature dendritic cell	0.614386
GSM5608968	sepsis	Macrophage	0.449352
GSM5608968	sepsis	Mast cell	0.39721
GSM5608968	sepsis	MDSC	1
GSM5608968	sepsis	Monocyte	0.827036
GSM5608968	sepsis	Natural killer cell	0.329886
GSM5608968	sepsis	Natural killer T cell	0.292838
GSM5608968	sepsis	Neutrophil	0.971097
GSM5608968	sepsis	Plasmacytoid dendritic cell	0.763194
GSM5608969	sepsis	Activated B cell	0.470219
GSM5608969	sepsis	Activated CD4 T cell	0.533349
GSM5608969	sepsis	Activated CD8 T cell	0.827578
GSM5608969	sepsis	Central memory CD4 T cell	0.842244
GSM5608969	sepsis	Central memory CD8 T cell	0.454794
GSM5608969	sepsis	Effector memeory CD4 T cell	0.497744
GSM5608969	sepsis	Effector memeory CD8 T cell	0.742743
GSM5608969	sepsis	Gamma delta T cell	0.489272
GSM5608969	sepsis	Immature B cell	0.790768
GSM5608969	sepsis	Memory B cell	0.180086
GSM5608969	sepsis	Regulatory T cell	0.606345
GSM5608969	sepsis	T follicular helper cell	0.347288
GSM5608969	sepsis	Type 1 T helper cell	0.30098
GSM5608969	sepsis	Type 17 T helper cell	0
GSM5608969	sepsis	Type 2 T helper cell	0.0822021
GSM5608969	sepsis	Activated dendritic cell	0.488087
GSM5608969	sepsis	CD56bright natural killer cell	0.47167
GSM5608969	sepsis	CD56dim natural killer cell	0.250677
GSM5608969	sepsis	Eosinophil	0.40179
GSM5608969	sepsis	Immature dendritic cell	0.699033
GSM5608969	sepsis	Macrophage	0.552404
GSM5608969	sepsis	Mast cell	0.498694
GSM5608969	sepsis	MDSC	1
GSM5608969	sepsis	Monocyte	0.751835
GSM5608969	sepsis	Natural killer cell	0.350092
GSM5608969	sepsis	Natural killer T cell	0.280659
GSM5608969	sepsis	Neutrophil	0.996193
GSM5608969	sepsis	Plasmacytoid dendritic cell	0.766622
GSM5608970	sepsis	Activated B cell	0.598119
GSM5608970	sepsis	Activated CD4 T cell	0.666184
GSM5608970	sepsis	Activated CD8 T cell	0.879141
GSM5608970	sepsis	Central memory CD4 T cell	0.868427
GSM5608970	sepsis	Central memory CD8 T cell	0.561116
GSM5608970	sepsis	Effector memeory CD4 T cell	0.434479
GSM5608970	sepsis	Effector memeory CD8 T cell	0.809826
GSM5608970	sepsis	Gamma delta T cell	0.51882
GSM5608970	sepsis	Immature B cell	0.825292
GSM5608970	sepsis	Memory B cell	0.407597
GSM5608970	sepsis	Regulatory T cell	0.586001
GSM5608970	sepsis	T follicular helper cell	0.417617
GSM5608970	sepsis	Type 1 T helper cell	0.367444
GSM5608970	sepsis	Type 17 T helper cell	0
GSM5608970	sepsis	Type 2 T helper cell	0.280796
GSM5608970	sepsis	Activated dendritic cell	0.605628
GSM5608970	sepsis	CD56bright natural killer cell	0.462314
GSM5608970	sepsis	CD56dim natural killer cell	0.291063
GSM5608970	sepsis	Eosinophil	0.415682
GSM5608970	sepsis	Immature dendritic cell	0.647361
GSM5608970	sepsis	Macrophage	0.534946
GSM5608970	sepsis	Mast cell	0.453094
GSM5608970	sepsis	MDSC	1
GSM5608970	sepsis	Monocyte	0.868871
GSM5608970	sepsis	Natural killer cell	0.359052
GSM5608970	sepsis	Natural killer T cell	0.317716
GSM5608970	sepsis	Neutrophil	0.980739
GSM5608970	sepsis	Plasmacytoid dendritic cell	0.798303
GSM5608971	sepsis	Activated B cell	0.450911
GSM5608971	sepsis	Activated CD4 T cell	0.393467
GSM5608971	sepsis	Activated CD8 T cell	0.720234
GSM5608971	sepsis	Central memory CD4 T cell	0.785334
GSM5608971	sepsis	Central memory CD8 T cell	0.414285
GSM5608971	sepsis	Effector memeory CD4 T cell	0.213358
GSM5608971	sepsis	Effector memeory CD8 T cell	0.670272
GSM5608971	sepsis	Gamma delta T cell	0.413321
GSM5608971	sepsis	Immature B cell	0.748356
GSM5608971	sepsis	Memory B cell	0.237875
GSM5608971	sepsis	Regulatory T cell	0.401621
GSM5608971	sepsis	T follicular helper cell	0.273272
GSM5608971	sepsis	Type 1 T helper cell	0.28386
GSM5608971	sepsis	Type 17 T helper cell	0
GSM5608971	sepsis	Type 2 T helper cell	0.0520905
GSM5608971	sepsis	Activated dendritic cell	0.524032
GSM5608971	sepsis	CD56bright natural killer cell	0.407947
GSM5608971	sepsis	CD56dim natural killer cell	0.154835
GSM5608971	sepsis	Eosinophil	0.336067
GSM5608971	sepsis	Immature dendritic cell	0.57501
GSM5608971	sepsis	Macrophage	0.461654
GSM5608971	sepsis	Mast cell	0.399163
GSM5608971	sepsis	MDSC	0.951297
GSM5608971	sepsis	Monocyte	0.792742
GSM5608971	sepsis	Natural killer cell	0.279141
GSM5608971	sepsis	Natural killer T cell	0.175773
GSM5608971	sepsis	Neutrophil	1
GSM5608971	sepsis	Plasmacytoid dendritic cell	0.699706
GSM5608972	sepsis	Activated B cell	0.626096
GSM5608972	sepsis	Activated CD4 T cell	0.533778
GSM5608972	sepsis	Activated CD8 T cell	0.868579
GSM5608972	sepsis	Central memory CD4 T cell	0.867763
GSM5608972	sepsis	Central memory CD8 T cell	0.501463
GSM5608972	sepsis	Effector memeory CD4 T cell	0.442291
GSM5608972	sepsis	Effector memeory CD8 T cell	0.815987
GSM5608972	sepsis	Gamma delta T cell	0.501041
GSM5608972	sepsis	Immature B cell	0.816039
GSM5608972	sepsis	Memory B cell	0.241195
GSM5608972	sepsis	Regulatory T cell	0.604592
GSM5608972	sepsis	T follicular helper cell	0.428846
GSM5608972	sepsis	Type 1 T helper cell	0.415688
GSM5608972	sepsis	Type 17 T helper cell	0
GSM5608972	sepsis	Type 2 T helper cell	0.187761
GSM5608972	sepsis	Activated dendritic cell	0.684245
GSM5608972	sepsis	CD56bright natural killer cell	0.47758
GSM5608972	sepsis	CD56dim natural killer cell	0.447635
GSM5608972	sepsis	Eosinophil	0.338505
GSM5608972	sepsis	Immature dendritic cell	0.653802
GSM5608972	sepsis	Macrophage	0.58867
GSM5608972	sepsis	Mast cell	0.428436
GSM5608972	sepsis	MDSC	1
GSM5608972	sepsis	Monocyte	0.87475
GSM5608972	sepsis	Natural killer cell	0.360886
GSM5608972	sepsis	Natural killer T cell	0.286162
GSM5608972	sepsis	Neutrophil	0.884877
GSM5608972	sepsis	Plasmacytoid dendritic cell	0.775087
GSM5608973	sepsis	Activated B cell	0.698372
GSM5608973	sepsis	Activated CD4 T cell	0.802072
GSM5608973	sepsis	Activated CD8 T cell	0.959733
GSM5608973	sepsis	Central memory CD4 T cell	0.897907
GSM5608973	sepsis	Central memory CD8 T cell	0.561689
GSM5608973	sepsis	Effector memeory CD4 T cell	0.370066
GSM5608973	sepsis	Effector memeory CD8 T cell	0.792898
GSM5608973	sepsis	Gamma delta T cell	0.557689
GSM5608973	sepsis	Immature B cell	0.831183
GSM5608973	sepsis	Memory B cell	0.344973
GSM5608973	sepsis	Regulatory T cell	0.531989
GSM5608973	sepsis	T follicular helper cell	0.337632
GSM5608973	sepsis	Type 1 T helper cell	0.423926
GSM5608973	sepsis	Type 17 T helper cell	0
GSM5608973	sepsis	Type 2 T helper cell	0.321788
GSM5608973	sepsis	Activated dendritic cell	0.527331
GSM5608973	sepsis	CD56bright natural killer cell	0.497263
GSM5608973	sepsis	CD56dim natural killer cell	0.272616
GSM5608973	sepsis	Eosinophil	0.332314
GSM5608973	sepsis	Immature dendritic cell	0.679411
GSM5608973	sepsis	Macrophage	0.479897
GSM5608973	sepsis	Mast cell	0.365323
GSM5608973	sepsis	MDSC	1
GSM5608973	sepsis	Monocyte	0.786017
GSM5608973	sepsis	Natural killer cell	0.361774
GSM5608973	sepsis	Natural killer T cell	0.319832
GSM5608973	sepsis	Neutrophil	0.756256
GSM5608973	sepsis	Plasmacytoid dendritic cell	0.767265
GSM5608974	sepsis	Activated B cell	0.746333
GSM5608974	sepsis	Activated CD4 T cell	0.634289
GSM5608974	sepsis	Activated CD8 T cell	0.889664
GSM5608974	sepsis	Central memory CD4 T cell	0.844577
GSM5608974	sepsis	Central memory CD8 T cell	0.530529
GSM5608974	sepsis	Effector memeory CD4 T cell	0.431287
GSM5608974	sepsis	Effector memeory CD8 T cell	0.82682
GSM5608974	sepsis	Gamma delta T cell	0.502246
GSM5608974	sepsis	Immature B cell	0.89697
GSM5608974	sepsis	Memory B cell	0.385564
GSM5608974	sepsis	Regulatory T cell	0.561474
GSM5608974	sepsis	T follicular helper cell	0.410239
GSM5608974	sepsis	Type 1 T helper cell	0.425656
GSM5608974	sepsis	Type 17 T helper cell	0
GSM5608974	sepsis	Type 2 T helper cell	0.249915
GSM5608974	sepsis	Activated dendritic cell	0.672033
GSM5608974	sepsis	CD56bright natural killer cell	0.473792
GSM5608974	sepsis	CD56dim natural killer cell	0.48803
GSM5608974	sepsis	Eosinophil	0.258256
GSM5608974	sepsis	Immature dendritic cell	0.615663
GSM5608974	sepsis	Macrophage	0.558117
GSM5608974	sepsis	Mast cell	0.377396
GSM5608974	sepsis	MDSC	1
GSM5608974	sepsis	Monocyte	0.815061
GSM5608974	sepsis	Natural killer cell	0.357911
GSM5608974	sepsis	Natural killer T cell	0.312349
GSM5608974	sepsis	Neutrophil	0.780939
GSM5608974	sepsis	Plasmacytoid dendritic cell	0.779558
GSM5608975	sepsis	Activated B cell	0.60015
GSM5608975	sepsis	Activated CD4 T cell	0.405301
GSM5608975	sepsis	Activated CD8 T cell	0.848759
GSM5608975	sepsis	Central memory CD4 T cell	0.818816
GSM5608975	sepsis	Central memory CD8 T cell	0.491999
GSM5608975	sepsis	Effector memeory CD4 T cell	0.361848
GSM5608975	sepsis	Effector memeory CD8 T cell	0.77852
GSM5608975	sepsis	Gamma delta T cell	0.530043
GSM5608975	sepsis	Immature B cell	0.800722
GSM5608975	sepsis	Memory B cell	0.27767
GSM5608975	sepsis	Regulatory T cell	0.577045
GSM5608975	sepsis	T follicular helper cell	0.367907
GSM5608975	sepsis	Type 1 T helper cell	0.397096
GSM5608975	sepsis	Type 17 T helper cell	0
GSM5608975	sepsis	Type 2 T helper cell	0.151572
GSM5608975	sepsis	Activated dendritic cell	0.667384
GSM5608975	sepsis	CD56bright natural killer cell	0.510275
GSM5608975	sepsis	CD56dim natural killer cell	0.439368
GSM5608975	sepsis	Eosinophil	0.286747
GSM5608975	sepsis	Immature dendritic cell	0.632365
GSM5608975	sepsis	Macrophage	0.576501
GSM5608975	sepsis	Mast cell	0.533953
GSM5608975	sepsis	MDSC	1
GSM5608975	sepsis	Monocyte	0.872315
GSM5608975	sepsis	Natural killer cell	0.404022
GSM5608975	sepsis	Natural killer T cell	0.327549
GSM5608975	sepsis	Neutrophil	0.954843
GSM5608975	sepsis	Plasmacytoid dendritic cell	0.790209
GSM5608976	sepsis	Activated B cell	0.64703
GSM5608976	sepsis	Activated CD4 T cell	0.377106
GSM5608976	sepsis	Activated CD8 T cell	0.861491
GSM5608976	sepsis	Central memory CD4 T cell	0.826257
GSM5608976	sepsis	Central memory CD8 T cell	0.493369
GSM5608976	sepsis	Effector memeory CD4 T cell	0.401474
GSM5608976	sepsis	Effector memeory CD8 T cell	0.813733
GSM5608976	sepsis	Gamma delta T cell	0.461628
GSM5608976	sepsis	Immature B cell	0.843823
GSM5608976	sepsis	Memory B cell	0.282768
GSM5608976	sepsis	Regulatory T cell	0.54826
GSM5608976	sepsis	T follicular helper cell	0.414594
GSM5608976	sepsis	Type 1 T helper cell	0.36821
GSM5608976	sepsis	Type 17 T helper cell	0
GSM5608976	sepsis	Type 2 T helper cell	0.0662829
GSM5608976	sepsis	Activated dendritic cell	0.638292
GSM5608976	sepsis	CD56bright natural killer cell	0.474219
GSM5608976	sepsis	CD56dim natural killer cell	0.479967
GSM5608976	sepsis	Eosinophil	0.318158
GSM5608976	sepsis	Immature dendritic cell	0.608134
GSM5608976	sepsis	Macrophage	0.516466
GSM5608976	sepsis	Mast cell	0.382485
GSM5608976	sepsis	MDSC	1
GSM5608976	sepsis	Monocyte	0.866859
GSM5608976	sepsis	Natural killer cell	0.300831
GSM5608976	sepsis	Natural killer T cell	0.274322
GSM5608976	sepsis	Neutrophil	0.919945
GSM5608976	sepsis	Plasmacytoid dendritic cell	0.753291
GSM5608977	sepsis	Activated B cell	0.529003
GSM5608977	sepsis	Activated CD4 T cell	0.437399
GSM5608977	sepsis	Activated CD8 T cell	0.76981
GSM5608977	sepsis	Central memory CD4 T cell	0.82625
GSM5608977	sepsis	Central memory CD8 T cell	0.44999
GSM5608977	sepsis	Effector memeory CD4 T cell	0.3863
GSM5608977	sepsis	Effector memeory CD8 T cell	0.682137
GSM5608977	sepsis	Gamma delta T cell	0.452799
GSM5608977	sepsis	Immature B cell	0.745385
GSM5608977	sepsis	Memory B cell	0.188265
GSM5608977	sepsis	Regulatory T cell	0.537888
GSM5608977	sepsis	T follicular helper cell	0.325825
GSM5608977	sepsis	Type 1 T helper cell	0.397184
GSM5608977	sepsis	Type 17 T helper cell	0
GSM5608977	sepsis	Type 2 T helper cell	0.123208
GSM5608977	sepsis	Activated dendritic cell	0.653245
GSM5608977	sepsis	CD56bright natural killer cell	0.457011
GSM5608977	sepsis	CD56dim natural killer cell	0.420771
GSM5608977	sepsis	Eosinophil	0.354994
GSM5608977	sepsis	Immature dendritic cell	0.653768
GSM5608977	sepsis	Macrophage	0.585027
GSM5608977	sepsis	Mast cell	0.556946
GSM5608977	sepsis	MDSC	1
GSM5608977	sepsis	Monocyte	0.863241
GSM5608977	sepsis	Natural killer cell	0.301644
GSM5608977	sepsis	Natural killer T cell	0.268345
GSM5608977	sepsis	Neutrophil	0.990335
GSM5608977	sepsis	Plasmacytoid dendritic cell	0.783045
GSM5608978	sepsis	Activated B cell	0.253691
GSM5608978	sepsis	Activated CD4 T cell	0.26414
GSM5608978	sepsis	Activated CD8 T cell	0.749147
GSM5608978	sepsis	Central memory CD4 T cell	0.771872
GSM5608978	sepsis	Central memory CD8 T cell	0.482562
GSM5608978	sepsis	Effector memeory CD4 T cell	0.306015
GSM5608978	sepsis	Effector memeory CD8 T cell	0.727718
GSM5608978	sepsis	Gamma delta T cell	0.436607
GSM5608978	sepsis	Immature B cell	0.572876
GSM5608978	sepsis	Memory B cell	0.199207
GSM5608978	sepsis	Regulatory T cell	0.536892
GSM5608978	sepsis	T follicular helper cell	0.36368
GSM5608978	sepsis	Type 1 T helper cell	0.304374
GSM5608978	sepsis	Type 17 T helper cell	0
GSM5608978	sepsis	Type 2 T helper cell	0.0102244
GSM5608978	sepsis	Activated dendritic cell	0.678789
GSM5608978	sepsis	CD56bright natural killer cell	0.34379
GSM5608978	sepsis	CD56dim natural killer cell	0.237158
GSM5608978	sepsis	Eosinophil	0.252431
GSM5608978	sepsis	Immature dendritic cell	0.457189
GSM5608978	sepsis	Macrophage	0.425194
GSM5608978	sepsis	Mast cell	0.277907
GSM5608978	sepsis	MDSC	1
GSM5608978	sepsis	Monocyte	0.846991
GSM5608978	sepsis	Natural killer cell	0.309029
GSM5608978	sepsis	Natural killer T cell	0.317109
GSM5608978	sepsis	Neutrophil	0.985984
GSM5608978	sepsis	Plasmacytoid dendritic cell	0.734042
GSM5608979	sepsis	Activated B cell	0.553071
GSM5608979	sepsis	Activated CD4 T cell	0.425154
GSM5608979	sepsis	Activated CD8 T cell	0.787681
GSM5608979	sepsis	Central memory CD4 T cell	0.811163
GSM5608979	sepsis	Central memory CD8 T cell	0.459243
GSM5608979	sepsis	Effector memeory CD4 T cell	0.398616
GSM5608979	sepsis	Effector memeory CD8 T cell	0.722039
GSM5608979	sepsis	Gamma delta T cell	0.4425
GSM5608979	sepsis	Immature B cell	0.784231
GSM5608979	sepsis	Memory B cell	0.334244
GSM5608979	sepsis	Regulatory T cell	0.543727
GSM5608979	sepsis	T follicular helper cell	0.32118
GSM5608979	sepsis	Type 1 T helper cell	0.328716
GSM5608979	sepsis	Type 17 T helper cell	0
GSM5608979	sepsis	Type 2 T helper cell	0.0714102
GSM5608979	sepsis	Activated dendritic cell	0.612856
GSM5608979	sepsis	CD56bright natural killer cell	0.438127
GSM5608979	sepsis	CD56dim natural killer cell	0.418854
GSM5608979	sepsis	Eosinophil	0.287581
GSM5608979	sepsis	Immature dendritic cell	0.590493
GSM5608979	sepsis	Macrophage	0.521617
GSM5608979	sepsis	Mast cell	0.339354
GSM5608979	sepsis	MDSC	1
GSM5608979	sepsis	Monocyte	0.855566
GSM5608979	sepsis	Natural killer cell	0.26244
GSM5608979	sepsis	Natural killer T cell	0.258851
GSM5608979	sepsis	Neutrophil	0.976856
GSM5608979	sepsis	Plasmacytoid dendritic cell	0.777608
GSM5608980	sepsis	Activated B cell	0.600189
GSM5608980	sepsis	Activated CD4 T cell	0.354062
GSM5608980	sepsis	Activated CD8 T cell	0.82418
GSM5608980	sepsis	Central memory CD4 T cell	0.825623
GSM5608980	sepsis	Central memory CD8 T cell	0.456624
GSM5608980	sepsis	Effector memeory CD4 T cell	0.419598
GSM5608980	sepsis	Effector memeory CD8 T cell	0.749624
GSM5608980	sepsis	Gamma delta T cell	0.464373
GSM5608980	sepsis	Immature B cell	0.822148
GSM5608980	sepsis	Memory B cell	0.274344
GSM5608980	sepsis	Regulatory T cell	0.537969
GSM5608980	sepsis	T follicular helper cell	0.425049
GSM5608980	sepsis	Type 1 T helper cell	0.362485
GSM5608980	sepsis	Type 17 T helper cell	0
GSM5608980	sepsis	Type 2 T helper cell	0.0504437
GSM5608980	sepsis	Activated dendritic cell	0.610179
GSM5608980	sepsis	CD56bright natural killer cell	0.451534
GSM5608980	sepsis	CD56dim natural killer cell	0.344418
GSM5608980	sepsis	Eosinophil	0.334245
GSM5608980	sepsis	Immature dendritic cell	0.603824
GSM5608980	sepsis	Macrophage	0.536871
GSM5608980	sepsis	Mast cell	0.396092
GSM5608980	sepsis	MDSC	0.99305
GSM5608980	sepsis	Monocyte	0.858571
GSM5608980	sepsis	Natural killer cell	0.325616
GSM5608980	sepsis	Natural killer T cell	0.299295
GSM5608980	sepsis	Neutrophil	1
GSM5608980	sepsis	Plasmacytoid dendritic cell	0.733623
GSM5608981	sepsis	Activated B cell	0.530871
GSM5608981	sepsis	Activated CD4 T cell	0.381252
GSM5608981	sepsis	Activated CD8 T cell	0.822427
GSM5608981	sepsis	Central memory CD4 T cell	0.801875
GSM5608981	sepsis	Central memory CD8 T cell	0.466725
GSM5608981	sepsis	Effector memeory CD4 T cell	0.409556
GSM5608981	sepsis	Effector memeory CD8 T cell	0.74607
GSM5608981	sepsis	Gamma delta T cell	0.519691
GSM5608981	sepsis	Immature B cell	0.731782
GSM5608981	sepsis	Memory B cell	0.352313
GSM5608981	sepsis	Regulatory T cell	0.572408
GSM5608981	sepsis	T follicular helper cell	0.390069
GSM5608981	sepsis	Type 1 T helper cell	0.358836
GSM5608981	sepsis	Type 17 T helper cell	0
GSM5608981	sepsis	Type 2 T helper cell	0.105882
GSM5608981	sepsis	Activated dendritic cell	0.68902
GSM5608981	sepsis	CD56bright natural killer cell	0.463824
GSM5608981	sepsis	CD56dim natural killer cell	0.452957
GSM5608981	sepsis	Eosinophil	0.299445
GSM5608981	sepsis	Immature dendritic cell	0.600619
GSM5608981	sepsis	Macrophage	0.55682
GSM5608981	sepsis	Mast cell	0.386993
GSM5608981	sepsis	MDSC	1
GSM5608981	sepsis	Monocyte	0.865999
GSM5608981	sepsis	Natural killer cell	0.290954
GSM5608981	sepsis	Natural killer T cell	0.301625
GSM5608981	sepsis	Neutrophil	0.918367
GSM5608981	sepsis	Plasmacytoid dendritic cell	0.756945
GSM5608982	sepsis	Activated B cell	0.429347
GSM5608982	sepsis	Activated CD4 T cell	0.341375
GSM5608982	sepsis	Activated CD8 T cell	0.748857
GSM5608982	sepsis	Central memory CD4 T cell	0.819646
GSM5608982	sepsis	Central memory CD8 T cell	0.512711
GSM5608982	sepsis	Effector memeory CD4 T cell	0.314469
GSM5608982	sepsis	Effector memeory CD8 T cell	0.696907
GSM5608982	sepsis	Gamma delta T cell	0.513389
GSM5608982	sepsis	Immature B cell	0.693265
GSM5608982	sepsis	Memory B cell	0.329589
GSM5608982	sepsis	Regulatory T cell	0.611549
GSM5608982	sepsis	T follicular helper cell	0.310281
GSM5608982	sepsis	Type 1 T helper cell	0.307221
GSM5608982	sepsis	Type 17 T helper cell	0
GSM5608982	sepsis	Type 2 T helper cell	0.0724292
GSM5608982	sepsis	Activated dendritic cell	0.638986
GSM5608982	sepsis	CD56bright natural killer cell	0.443695
GSM5608982	sepsis	CD56dim natural killer cell	0.322504
GSM5608982	sepsis	Eosinophil	0.283933
GSM5608982	sepsis	Immature dendritic cell	0.596098
GSM5608982	sepsis	Macrophage	0.631526
GSM5608982	sepsis	Mast cell	0.457439
GSM5608982	sepsis	MDSC	1
GSM5608982	sepsis	Monocyte	0.822558
GSM5608982	sepsis	Natural killer cell	0.346296
GSM5608982	sepsis	Natural killer T cell	0.300657
GSM5608982	sepsis	Neutrophil	0.988272
GSM5608982	sepsis	Plasmacytoid dendritic cell	0.787914
GSM5608983	sepsis	Activated B cell	0.548929
GSM5608983	sepsis	Activated CD4 T cell	0.531594
GSM5608983	sepsis	Activated CD8 T cell	0.831629
GSM5608983	sepsis	Central memory CD4 T cell	0.838418
GSM5608983	sepsis	Central memory CD8 T cell	0.469298
GSM5608983	sepsis	Effector memeory CD4 T cell	0.4315
GSM5608983	sepsis	Effector memeory CD8 T cell	0.761468
GSM5608983	sepsis	Gamma delta T cell	0.460785
GSM5608983	sepsis	Immature B cell	0.744644
GSM5608983	sepsis	Memory B cell	0.21206
GSM5608983	sepsis	Regulatory T cell	0.596419
GSM5608983	sepsis	T follicular helper cell	0.360246
GSM5608983	sepsis	Type 1 T helper cell	0.385106
GSM5608983	sepsis	Type 17 T helper cell	0
GSM5608983	sepsis	Type 2 T helper cell	0.105559
GSM5608983	sepsis	Activated dendritic cell	0.665836
GSM5608983	sepsis	CD56bright natural killer cell	0.448931
GSM5608983	sepsis	CD56dim natural killer cell	0.462559
GSM5608983	sepsis	Eosinophil	0.253888
GSM5608983	sepsis	Immature dendritic cell	0.553405
GSM5608983	sepsis	Macrophage	0.574333
GSM5608983	sepsis	Mast cell	0.399509
GSM5608983	sepsis	MDSC	1
GSM5608983	sepsis	Monocyte	0.830245
GSM5608983	sepsis	Natural killer cell	0.277601
GSM5608983	sepsis	Natural killer T cell	0.341253
GSM5608983	sepsis	Neutrophil	0.963078
GSM5608983	sepsis	Plasmacytoid dendritic cell	0.768484
GSM5608984	sepsis	Activated B cell	0.594575
GSM5608984	sepsis	Activated CD4 T cell	0.734295
GSM5608984	sepsis	Activated CD8 T cell	0.915058
GSM5608984	sepsis	Central memory CD4 T cell	0.891572
GSM5608984	sepsis	Central memory CD8 T cell	0.512592
GSM5608984	sepsis	Effector memeory CD4 T cell	0.449496
GSM5608984	sepsis	Effector memeory CD8 T cell	0.817764
GSM5608984	sepsis	Gamma delta T cell	0.527121
GSM5608984	sepsis	Immature B cell	0.742883
GSM5608984	sepsis	Memory B cell	0.377799
GSM5608984	sepsis	Regulatory T cell	0.547495
GSM5608984	sepsis	T follicular helper cell	0.415941
GSM5608984	sepsis	Type 1 T helper cell	0.425735
GSM5608984	sepsis	Type 17 T helper cell	0
GSM5608984	sepsis	Type 2 T helper cell	0.31523
GSM5608984	sepsis	Activated dendritic cell	0.610065
GSM5608984	sepsis	CD56bright natural killer cell	0.44823
GSM5608984	sepsis	CD56dim natural killer cell	0.473623
GSM5608984	sepsis	Eosinophil	0.229485
GSM5608984	sepsis	Immature dendritic cell	0.614716
GSM5608984	sepsis	Macrophage	0.512888
GSM5608984	sepsis	Mast cell	0.347884
GSM5608984	sepsis	MDSC	1
GSM5608984	sepsis	Monocyte	0.801186
GSM5608984	sepsis	Natural killer cell	0.327453
GSM5608984	sepsis	Natural killer T cell	0.32234
GSM5608984	sepsis	Neutrophil	0.773963
GSM5608984	sepsis	Plasmacytoid dendritic cell	0.762299
GSM5608985	sepsis	Activated B cell	0.447122
GSM5608985	sepsis	Activated CD4 T cell	0.450516
GSM5608985	sepsis	Activated CD8 T cell	0.802076
GSM5608985	sepsis	Central memory CD4 T cell	0.801034
GSM5608985	sepsis	Central memory CD8 T cell	0.48639
GSM5608985	sepsis	Effector memeory CD4 T cell	0.307658
GSM5608985	sepsis	Effector memeory CD8 T cell	0.808854
GSM5608985	sepsis	Gamma delta T cell	0.403323
GSM5608985	sepsis	Immature B cell	0.764768
GSM5608985	sepsis	Memory B cell	0.187688
GSM5608985	sepsis	Regulatory T cell	0.508112
GSM5608985	sepsis	T follicular helper cell	0.345106
GSM5608985	sepsis	Type 1 T helper cell	0.300652
GSM5608985	sepsis	Type 17 T helper cell	0
GSM5608985	sepsis	Type 2 T helper cell	0.0345899
GSM5608985	sepsis	Activated dendritic cell	0.613609
GSM5608985	sepsis	CD56bright natural killer cell	0.389608
GSM5608985	sepsis	CD56dim natural killer cell	0.369684
GSM5608985	sepsis	Eosinophil	0.201656
GSM5608985	sepsis	Immature dendritic cell	0.499769
GSM5608985	sepsis	Macrophage	0.537833
GSM5608985	sepsis	Mast cell	0.291064
GSM5608985	sepsis	MDSC	1
GSM5608985	sepsis	Monocyte	0.831439
GSM5608985	sepsis	Natural killer cell	0.317214
GSM5608985	sepsis	Natural killer T cell	0.238539
GSM5608985	sepsis	Neutrophil	0.941197
GSM5608985	sepsis	Plasmacytoid dendritic cell	0.740316
GSM5608986	sepsis	Activated B cell	0.64036
GSM5608986	sepsis	Activated CD4 T cell	0.627956
GSM5608986	sepsis	Activated CD8 T cell	0.863275
GSM5608986	sepsis	Central memory CD4 T cell	0.837351
GSM5608986	sepsis	Central memory CD8 T cell	0.477828
GSM5608986	sepsis	Effector memeory CD4 T cell	0.36386
GSM5608986	sepsis	Effector memeory CD8 T cell	0.811237
GSM5608986	sepsis	Gamma delta T cell	0.485259
GSM5608986	sepsis	Immature B cell	0.753881
GSM5608986	sepsis	Memory B cell	0.283714
GSM5608986	sepsis	Regulatory T cell	0.599341
GSM5608986	sepsis	T follicular helper cell	0.41269
GSM5608986	sepsis	Type 1 T helper cell	0.391692
GSM5608986	sepsis	Type 17 T helper cell	0
GSM5608986	sepsis	Type 2 T helper cell	0.22107
GSM5608986	sepsis	Activated dendritic cell	0.664091
GSM5608986	sepsis	CD56bright natural killer cell	0.410374
GSM5608986	sepsis	CD56dim natural killer cell	0.400648
GSM5608986	sepsis	Eosinophil	0.258672
GSM5608986	sepsis	Immature dendritic cell	0.591285
GSM5608986	sepsis	Macrophage	0.604107
GSM5608986	sepsis	Mast cell	0.385831
GSM5608986	sepsis	MDSC	1
GSM5608986	sepsis	Monocyte	0.837187
GSM5608986	sepsis	Natural killer cell	0.293606
GSM5608986	sepsis	Natural killer T cell	0.28289
GSM5608986	sepsis	Neutrophil	0.896692
GSM5608986	sepsis	Plasmacytoid dendritic cell	0.773876
GSM5608987	sepsis	Activated B cell	0.709146
GSM5608987	sepsis	Activated CD4 T cell	0.707701
GSM5608987	sepsis	Activated CD8 T cell	0.925096
GSM5608987	sepsis	Central memory CD4 T cell	0.852516
GSM5608987	sepsis	Central memory CD8 T cell	0.48643
GSM5608987	sepsis	Effector memeory CD4 T cell	0.363755
GSM5608987	sepsis	Effector memeory CD8 T cell	0.812185
GSM5608987	sepsis	Gamma delta T cell	0.548222
GSM5608987	sepsis	Immature B cell	0.839255
GSM5608987	sepsis	Memory B cell	0.415956
GSM5608987	sepsis	Regulatory T cell	0.54503
GSM5608987	sepsis	T follicular helper cell	0.416378
GSM5608987	sepsis	Type 1 T helper cell	0.407633
GSM5608987	sepsis	Type 17 T helper cell	0
GSM5608987	sepsis	Type 2 T helper cell	0.295852
GSM5608987	sepsis	Activated dendritic cell	0.554794
GSM5608987	sepsis	CD56bright natural killer cell	0.461756
GSM5608987	sepsis	CD56dim natural killer cell	0.451146
GSM5608987	sepsis	Eosinophil	0.232697
GSM5608987	sepsis	Immature dendritic cell	0.58689
GSM5608987	sepsis	Macrophage	0.511695
GSM5608987	sepsis	Mast cell	0.288036
GSM5608987	sepsis	MDSC	1
GSM5608987	sepsis	Monocyte	0.800388
GSM5608987	sepsis	Natural killer cell	0.307542
GSM5608987	sepsis	Natural killer T cell	0.335542
GSM5608987	sepsis	Neutrophil	0.723023
GSM5608987	sepsis	Plasmacytoid dendritic cell	0.758401
GSM5608988	sepsis	Activated B cell	0.708359
GSM5608988	sepsis	Activated CD4 T cell	0.767295
GSM5608988	sepsis	Activated CD8 T cell	0.9471
GSM5608988	sepsis	Central memory CD4 T cell	0.874087
GSM5608988	sepsis	Central memory CD8 T cell	0.448357
GSM5608988	sepsis	Effector memeory CD4 T cell	0.445961
GSM5608988	sepsis	Effector memeory CD8 T cell	0.814362
GSM5608988	sepsis	Gamma delta T cell	0.541906
GSM5608988	sepsis	Immature B cell	0.880146
GSM5608988	sepsis	Memory B cell	0.33667
GSM5608988	sepsis	Regulatory T cell	0.538405
GSM5608988	sepsis	T follicular helper cell	0.343177
GSM5608988	sepsis	Type 1 T helper cell	0.390553
GSM5608988	sepsis	Type 17 T helper cell	0
GSM5608988	sepsis	Type 2 T helper cell	0.26278
GSM5608988	sepsis	Activated dendritic cell	0.598724
GSM5608988	sepsis	CD56bright natural killer cell	0.429584
GSM5608988	sepsis	CD56dim natural killer cell	0.41883
GSM5608988	sepsis	Eosinophil	0.211092
GSM5608988	sepsis	Immature dendritic cell	0.62915
GSM5608988	sepsis	Macrophage	0.471058
GSM5608988	sepsis	Mast cell	0.322725
GSM5608988	sepsis	MDSC	1
GSM5608988	sepsis	Monocyte	0.777256
GSM5608988	sepsis	Natural killer cell	0.322033
GSM5608988	sepsis	Natural killer T cell	0.218877
GSM5608988	sepsis	Neutrophil	0.615894
GSM5608988	sepsis	Plasmacytoid dendritic cell	0.737112
GSM5608989	sepsis	Activated B cell	0.682134
GSM5608989	sepsis	Activated CD4 T cell	0.588557
GSM5608989	sepsis	Activated CD8 T cell	0.863517
GSM5608989	sepsis	Central memory CD4 T cell	0.841907
GSM5608989	sepsis	Central memory CD8 T cell	0.486125
GSM5608989	sepsis	Effector memeory CD4 T cell	0.435725
GSM5608989	sepsis	Effector memeory CD8 T cell	0.796089
GSM5608989	sepsis	Gamma delta T cell	0.490778
GSM5608989	sepsis	Immature B cell	0.844787
GSM5608989	sepsis	Memory B cell	0.4037
GSM5608989	sepsis	Regulatory T cell	0.569859
GSM5608989	sepsis	T follicular helper cell	0.414368
GSM5608989	sepsis	Type 1 T helper cell	0.413368
GSM5608989	sepsis	Type 17 T helper cell	0
GSM5608989	sepsis	Type 2 T helper cell	0.182436
GSM5608989	sepsis	Activated dendritic cell	0.667287
GSM5608989	sepsis	CD56bright natural killer cell	0.443174
GSM5608989	sepsis	CD56dim natural killer cell	0.452386
GSM5608989	sepsis	Eosinophil	0.370073
GSM5608989	sepsis	Immature dendritic cell	0.593556
GSM5608989	sepsis	Macrophage	0.578709
GSM5608989	sepsis	Mast cell	0.468194
GSM5608989	sepsis	MDSC	1
GSM5608989	sepsis	Monocyte	0.842098
GSM5608989	sepsis	Natural killer cell	0.388118
GSM5608989	sepsis	Natural killer T cell	0.368992
GSM5608989	sepsis	Neutrophil	0.838389
GSM5608989	sepsis	Plasmacytoid dendritic cell	0.737436
GSM5608990	sepsis	Activated B cell	0.696488
GSM5608990	sepsis	Activated CD4 T cell	0.669945
GSM5608990	sepsis	Activated CD8 T cell	0.951765
GSM5608990	sepsis	Central memory CD4 T cell	0.874842
GSM5608990	sepsis	Central memory CD8 T cell	0.437773
GSM5608990	sepsis	Effector memeory CD4 T cell	0.404634
GSM5608990	sepsis	Effector memeory CD8 T cell	0.82031
GSM5608990	sepsis	Gamma delta T cell	0.487669
GSM5608990	sepsis	Immature B cell	0.850833
GSM5608990	sepsis	Memory B cell	0.357419
GSM5608990	sepsis	Regulatory T cell	0.526718
GSM5608990	sepsis	T follicular helper cell	0.338569
GSM5608990	sepsis	Type 1 T helper cell	0.37521
GSM5608990	sepsis	Type 17 T helper cell	0
GSM5608990	sepsis	Type 2 T helper cell	0.215859
GSM5608990	sepsis	Activated dendritic cell	0.601434
GSM5608990	sepsis	CD56bright natural killer cell	0.428638
GSM5608990	sepsis	CD56dim natural killer cell	0.409265
GSM5608990	sepsis	Eosinophil	0.20487
GSM5608990	sepsis	Immature dendritic cell	0.574439
GSM5608990	sepsis	Macrophage	0.511451
GSM5608990	sepsis	Mast cell	0.3236
GSM5608990	sepsis	MDSC	1
GSM5608990	sepsis	Monocyte	0.805372
GSM5608990	sepsis	Natural killer cell	0.332864
GSM5608990	sepsis	Natural killer T cell	0.257321
GSM5608990	sepsis	Neutrophil	0.74394
GSM5608990	sepsis	Plasmacytoid dendritic cell	0.782681
GSM5608991	sepsis	Activated B cell	0.570646
GSM5608991	sepsis	Activated CD4 T cell	0.743235
GSM5608991	sepsis	Activated CD8 T cell	0.930846
GSM5608991	sepsis	Central memory CD4 T cell	0.875926
GSM5608991	sepsis	Central memory CD8 T cell	0.526314
GSM5608991	sepsis	Effector memeory CD4 T cell	0.450259
GSM5608991	sepsis	Effector memeory CD8 T cell	0.810377
GSM5608991	sepsis	Gamma delta T cell	0.520877
GSM5608991	sepsis	Immature B cell	0.75728
GSM5608991	sepsis	Memory B cell	0.282437
GSM5608991	sepsis	Regulatory T cell	0.544339
GSM5608991	sepsis	T follicular helper cell	0.376597
GSM5608991	sepsis	Type 1 T helper cell	0.372478
GSM5608991	sepsis	Type 17 T helper cell	0
GSM5608991	sepsis	Type 2 T helper cell	0.266803
GSM5608991	sepsis	Activated dendritic cell	0.56691
GSM5608991	sepsis	CD56bright natural killer cell	0.455648
GSM5608991	sepsis	CD56dim natural killer cell	0.456189
GSM5608991	sepsis	Eosinophil	0.229822
GSM5608991	sepsis	Immature dendritic cell	0.600858
GSM5608991	sepsis	Macrophage	0.532795
GSM5608991	sepsis	Mast cell	0.305527
GSM5608991	sepsis	MDSC	1
GSM5608991	sepsis	Monocyte	0.80966
GSM5608991	sepsis	Natural killer cell	0.319387
GSM5608991	sepsis	Natural killer T cell	0.30865
GSM5608991	sepsis	Neutrophil	0.752916
GSM5608991	sepsis	Plasmacytoid dendritic cell	0.731415
GSM5608992	sepsis	Activated B cell	0.497979
GSM5608992	sepsis	Activated CD4 T cell	0.510717
GSM5608992	sepsis	Activated CD8 T cell	0.770461
GSM5608992	sepsis	Central memory CD4 T cell	0.782722
GSM5608992	sepsis	Central memory CD8 T cell	0.408016
GSM5608992	sepsis	Effector memeory CD4 T cell	0.341864
GSM5608992	sepsis	Effector memeory CD8 T cell	0.659488
GSM5608992	sepsis	Gamma delta T cell	0.475819
GSM5608992	sepsis	Immature B cell	0.735585
GSM5608992	sepsis	Memory B cell	0.339712
GSM5608992	sepsis	Regulatory T cell	0.50452
GSM5608992	sepsis	T follicular helper cell	0.366266
GSM5608992	sepsis	Type 1 T helper cell	0.391571
GSM5608992	sepsis	Type 17 T helper cell	0
GSM5608992	sepsis	Type 2 T helper cell	0.169445
GSM5608992	sepsis	Activated dendritic cell	0.646753
GSM5608992	sepsis	CD56bright natural killer cell	0.426387
GSM5608992	sepsis	CD56dim natural killer cell	0.259467
GSM5608992	sepsis	Eosinophil	0.400181
GSM5608992	sepsis	Immature dendritic cell	0.622101
GSM5608992	sepsis	Macrophage	0.491375
GSM5608992	sepsis	Mast cell	0.435498
GSM5608992	sepsis	MDSC	0.933999
GSM5608992	sepsis	Monocyte	0.767447
GSM5608992	sepsis	Natural killer cell	0.379497
GSM5608992	sepsis	Natural killer T cell	0.31713
GSM5608992	sepsis	Neutrophil	1
GSM5608992	sepsis	Plasmacytoid dendritic cell	0.749392
GSM5608993	sepsis	Activated B cell	0.524639
GSM5608993	sepsis	Activated CD4 T cell	0.409458
GSM5608993	sepsis	Activated CD8 T cell	0.82444
GSM5608993	sepsis	Central memory CD4 T cell	0.817078
GSM5608993	sepsis	Central memory CD8 T cell	0.560658
GSM5608993	sepsis	Effector memeory CD4 T cell	0.387037
GSM5608993	sepsis	Effector memeory CD8 T cell	0.789355
GSM5608993	sepsis	Gamma delta T cell	0.495044
GSM5608993	sepsis	Immature B cell	0.764711
GSM5608993	sepsis	Memory B cell	0.0621315
GSM5608993	sepsis	Regulatory T cell	0.60346
GSM5608993	sepsis	T follicular helper cell	0.403638
GSM5608993	sepsis	Type 1 T helper cell	0.3344
GSM5608993	sepsis	Type 17 T helper cell	0
GSM5608993	sepsis	Type 2 T helper cell	0.0622702
GSM5608993	sepsis	Activated dendritic cell	0.706736
GSM5608993	sepsis	CD56bright natural killer cell	0.44125
GSM5608993	sepsis	CD56dim natural killer cell	0.402137
GSM5608993	sepsis	Eosinophil	0.313361
GSM5608993	sepsis	Immature dendritic cell	0.539099
GSM5608993	sepsis	Macrophage	0.502097
GSM5608993	sepsis	Mast cell	0.429883
GSM5608993	sepsis	MDSC	1
GSM5608993	sepsis	Monocyte	0.866122
GSM5608993	sepsis	Natural killer cell	0.397147
GSM5608993	sepsis	Natural killer T cell	0.283486
GSM5608993	sepsis	Neutrophil	0.949977
GSM5608993	sepsis	Plasmacytoid dendritic cell	0.777888
GSM5608994	sepsis	Activated B cell	0.711675
GSM5608994	sepsis	Activated CD4 T cell	0.603195
GSM5608994	sepsis	Activated CD8 T cell	0.873862
GSM5608994	sepsis	Central memory CD4 T cell	0.843532
GSM5608994	sepsis	Central memory CD8 T cell	0.505315
GSM5608994	sepsis	Effector memeory CD4 T cell	0.29596
GSM5608994	sepsis	Effector memeory CD8 T cell	0.780619
GSM5608994	sepsis	Gamma delta T cell	0.53585
GSM5608994	sepsis	Immature B cell	0.836317
GSM5608994	sepsis	Memory B cell	0.352421
GSM5608994	sepsis	Regulatory T cell	0.55187
GSM5608994	sepsis	T follicular helper cell	0.36973
GSM5608994	sepsis	Type 1 T helper cell	0.378026
GSM5608994	sepsis	Type 17 T helper cell	0
GSM5608994	sepsis	Type 2 T helper cell	0.181763
GSM5608994	sepsis	Activated dendritic cell	0.618219
GSM5608994	sepsis	CD56bright natural killer cell	0.429191
GSM5608994	sepsis	CD56dim natural killer cell	0.424431
GSM5608994	sepsis	Eosinophil	0.229941
GSM5608994	sepsis	Immature dendritic cell	0.605714
GSM5608994	sepsis	Macrophage	0.544485
GSM5608994	sepsis	Mast cell	0.392647
GSM5608994	sepsis	MDSC	1
GSM5608994	sepsis	Monocyte	0.81152
GSM5608994	sepsis	Natural killer cell	0.306436
GSM5608994	sepsis	Natural killer T cell	0.271522
GSM5608994	sepsis	Neutrophil	0.772572
GSM5608994	sepsis	Plasmacytoid dendritic cell	0.7541
GSM5608995	sepsis	Activated B cell	0.646793
GSM5608995	sepsis	Activated CD4 T cell	0.323437
GSM5608995	sepsis	Activated CD8 T cell	0.740718
GSM5608995	sepsis	Central memory CD4 T cell	0.812942
GSM5608995	sepsis	Central memory CD8 T cell	0.421375
GSM5608995	sepsis	Effector memeory CD4 T cell	0.320059
GSM5608995	sepsis	Effector memeory CD8 T cell	0.758066
GSM5608995	sepsis	Gamma delta T cell	0.397708
GSM5608995	sepsis	Immature B cell	0.831522
GSM5608995	sepsis	Memory B cell	0.186062
GSM5608995	sepsis	Regulatory T cell	0.535865
GSM5608995	sepsis	T follicular helper cell	0.355576
GSM5608995	sepsis	Type 1 T helper cell	0.313417
GSM5608995	sepsis	Type 17 T helper cell	0
GSM5608995	sepsis	Type 2 T helper cell	0.0214926
GSM5608995	sepsis	Activated dendritic cell	0.690284
GSM5608995	sepsis	CD56bright natural killer cell	0.462133
GSM5608995	sepsis	CD56dim natural killer cell	0.389478
GSM5608995	sepsis	Eosinophil	0.31041
GSM5608995	sepsis	Immature dendritic cell	0.568455
GSM5608995	sepsis	Macrophage	0.51765
GSM5608995	sepsis	Mast cell	0.442854
GSM5608995	sepsis	MDSC	1
GSM5608995	sepsis	Monocyte	0.835706
GSM5608995	sepsis	Natural killer cell	0.273733
GSM5608995	sepsis	Natural killer T cell	0.26685
GSM5608995	sepsis	Neutrophil	0.971949
GSM5608995	sepsis	Plasmacytoid dendritic cell	0.753473
GSM5608996	sepsis	Activated B cell	0.440048
GSM5608996	sepsis	Activated CD4 T cell	0.357983
GSM5608996	sepsis	Activated CD8 T cell	0.782246
GSM5608996	sepsis	Central memory CD4 T cell	0.785988
GSM5608996	sepsis	Central memory CD8 T cell	0.495012
GSM5608996	sepsis	Effector memeory CD4 T cell	0.360458
GSM5608996	sepsis	Effector memeory CD8 T cell	0.744037
GSM5608996	sepsis	Gamma delta T cell	0.458815
GSM5608996	sepsis	Immature B cell	0.731431
GSM5608996	sepsis	Memory B cell	0.0734032
GSM5608996	sepsis	Regulatory T cell	0.521162
GSM5608996	sepsis	T follicular helper cell	0.417665
GSM5608996	sepsis	Type 1 T helper cell	0.366129
GSM5608996	sepsis	Type 17 T helper cell	0
GSM5608996	sepsis	Type 2 T helper cell	0.00412991
GSM5608996	sepsis	Activated dendritic cell	0.715137
GSM5608996	sepsis	CD56bright natural killer cell	0.411466
GSM5608996	sepsis	CD56dim natural killer cell	0.411135
GSM5608996	sepsis	Eosinophil	0.249404
GSM5608996	sepsis	Immature dendritic cell	0.515821
GSM5608996	sepsis	Macrophage	0.509033
GSM5608996	sepsis	Mast cell	0.344731
GSM5608996	sepsis	MDSC	0.995535
GSM5608996	sepsis	Monocyte	0.863823
GSM5608996	sepsis	Natural killer cell	0.333133
GSM5608996	sepsis	Natural killer T cell	0.321237
GSM5608996	sepsis	Neutrophil	1
GSM5608996	sepsis	Plasmacytoid dendritic cell	0.757929
GSM5608997	sepsis	Activated B cell	0.681672
GSM5608997	sepsis	Activated CD4 T cell	0.489624
GSM5608997	sepsis	Activated CD8 T cell	0.857522
GSM5608997	sepsis	Central memory CD4 T cell	0.86666
GSM5608997	sepsis	Central memory CD8 T cell	0.508464
GSM5608997	sepsis	Effector memeory CD4 T cell	0.332035
GSM5608997	sepsis	Effector memeory CD8 T cell	0.838341
GSM5608997	sepsis	Gamma delta T cell	0.471657
GSM5608997	sepsis	Immature B cell	0.821048
GSM5608997	sepsis	Memory B cell	0.341197
GSM5608997	sepsis	Regulatory T cell	0.501548
GSM5608997	sepsis	T follicular helper cell	0.405368
GSM5608997	sepsis	Type 1 T helper cell	0.370816
GSM5608997	sepsis	Type 17 T helper cell	0
GSM5608997	sepsis	Type 2 T helper cell	0.135719
GSM5608997	sepsis	Activated dendritic cell	0.636919
GSM5608997	sepsis	CD56bright natural killer cell	0.455455
GSM5608997	sepsis	CD56dim natural killer cell	0.461518
GSM5608997	sepsis	Eosinophil	0.161977
GSM5608997	sepsis	Immature dendritic cell	0.570244
GSM5608997	sepsis	Macrophage	0.508426
GSM5608997	sepsis	Mast cell	0.32145
GSM5608997	sepsis	MDSC	1
GSM5608997	sepsis	Monocyte	0.807941
GSM5608997	sepsis	Natural killer cell	0.371171
GSM5608997	sepsis	Natural killer T cell	0.29
GSM5608997	sepsis	Neutrophil	0.774349
GSM5608997	sepsis	Plasmacytoid dendritic cell	0.749593
GSM5608998	sepsis	Activated B cell	0.703798
GSM5608998	sepsis	Activated CD4 T cell	0.552802
GSM5608998	sepsis	Activated CD8 T cell	0.84713
GSM5608998	sepsis	Central memory CD4 T cell	0.862373
GSM5608998	sepsis	Central memory CD8 T cell	0.464276
GSM5608998	sepsis	Effector memeory CD4 T cell	0.363383
GSM5608998	sepsis	Effector memeory CD8 T cell	0.80586
GSM5608998	sepsis	Gamma delta T cell	0.512393
GSM5608998	sepsis	Immature B cell	0.866604
GSM5608998	sepsis	Memory B cell	0.389475
GSM5608998	sepsis	Regulatory T cell	0.554134
GSM5608998	sepsis	T follicular helper cell	0.409224
GSM5608998	sepsis	Type 1 T helper cell	0.432509
GSM5608998	sepsis	Type 17 T helper cell	0
GSM5608998	sepsis	Type 2 T helper cell	0.249142
GSM5608998	sepsis	Activated dendritic cell	0.691715
GSM5608998	sepsis	CD56bright natural killer cell	0.462419
GSM5608998	sepsis	CD56dim natural killer cell	0.428931
GSM5608998	sepsis	Eosinophil	0.379803
GSM5608998	sepsis	Immature dendritic cell	0.672356
GSM5608998	sepsis	Macrophage	0.565276
GSM5608998	sepsis	Mast cell	0.51091
GSM5608998	sepsis	MDSC	1
GSM5608998	sepsis	Monocyte	0.838232
GSM5608998	sepsis	Natural killer cell	0.365388
GSM5608998	sepsis	Natural killer T cell	0.347182
GSM5608998	sepsis	Neutrophil	0.855937
GSM5608998	sepsis	Plasmacytoid dendritic cell	0.798348
GSM5608999	sepsis	Activated B cell	0.659111
GSM5608999	sepsis	Activated CD4 T cell	0.468778
GSM5608999	sepsis	Activated CD8 T cell	0.786002
GSM5608999	sepsis	Central memory CD4 T cell	0.775809
GSM5608999	sepsis	Central memory CD8 T cell	0.394336
GSM5608999	sepsis	Effector memeory CD4 T cell	0.172114
GSM5608999	sepsis	Effector memeory CD8 T cell	0.692991
GSM5608999	sepsis	Gamma delta T cell	0.442416
GSM5608999	sepsis	Immature B cell	0.801763
GSM5608999	sepsis	Memory B cell	0.229069
GSM5608999	sepsis	Regulatory T cell	0.525456
GSM5608999	sepsis	T follicular helper cell	0.329604
GSM5608999	sepsis	Type 1 T helper cell	0.301649
GSM5608999	sepsis	Type 17 T helper cell	0
GSM5608999	sepsis	Type 2 T helper cell	0.0567874
GSM5608999	sepsis	Activated dendritic cell	0.564544
GSM5608999	sepsis	CD56bright natural killer cell	0.339641
GSM5608999	sepsis	CD56dim natural killer cell	0.393121
GSM5608999	sepsis	Eosinophil	0.271987
GSM5608999	sepsis	Immature dendritic cell	0.550101
GSM5608999	sepsis	Macrophage	0.496184
GSM5608999	sepsis	Mast cell	0.319145
GSM5608999	sepsis	MDSC	0.997727
GSM5608999	sepsis	Monocyte	0.833339
GSM5608999	sepsis	Natural killer cell	0.200659
GSM5608999	sepsis	Natural killer T cell	0.142544
GSM5608999	sepsis	Neutrophil	1
GSM5608999	sepsis	Plasmacytoid dendritic cell	0.797849
GSM5609000	sepsis	Activated B cell	0.582658
GSM5609000	sepsis	Activated CD4 T cell	0.454611
GSM5609000	sepsis	Activated CD8 T cell	0.815841
GSM5609000	sepsis	Central memory CD4 T cell	0.822705
GSM5609000	sepsis	Central memory CD8 T cell	0.456599
GSM5609000	sepsis	Effector memeory CD4 T cell	0.252973
GSM5609000	sepsis	Effector memeory CD8 T cell	0.786844
GSM5609000	sepsis	Gamma delta T cell	0.457243
GSM5609000	sepsis	Immature B cell	0.783059
GSM5609000	sepsis	Memory B cell	0.291618
GSM5609000	sepsis	Regulatory T cell	0.573847
GSM5609000	sepsis	T follicular helper cell	0.401224
GSM5609000	sepsis	Type 1 T helper cell	0.35795
GSM5609000	sepsis	Type 17 T helper cell	0
GSM5609000	sepsis	Type 2 T helper cell	0.10558
GSM5609000	sepsis	Activated dendritic cell	0.686448
GSM5609000	sepsis	CD56bright natural killer cell	0.431313
GSM5609000	sepsis	CD56dim natural killer cell	0.437113
GSM5609000	sepsis	Eosinophil	0.284123
GSM5609000	sepsis	Immature dendritic cell	0.566405
GSM5609000	sepsis	Macrophage	0.487428
GSM5609000	sepsis	Mast cell	0.313198
GSM5609000	sepsis	MDSC	1
GSM5609000	sepsis	Monocyte	0.853905
GSM5609000	sepsis	Natural killer cell	0.337439
GSM5609000	sepsis	Natural killer T cell	0.260571
GSM5609000	sepsis	Neutrophil	0.943746
GSM5609000	sepsis	Plasmacytoid dendritic cell	0.757903
GSM5609001	sepsis	Activated B cell	0.42713
GSM5609001	sepsis	Activated CD4 T cell	0.337004
GSM5609001	sepsis	Activated CD8 T cell	0.817277
GSM5609001	sepsis	Central memory CD4 T cell	0.798749
GSM5609001	sepsis	Central memory CD8 T cell	0.472382
GSM5609001	sepsis	Effector memeory CD4 T cell	0.332052
GSM5609001	sepsis	Effector memeory CD8 T cell	0.775862
GSM5609001	sepsis	Gamma delta T cell	0.473175
GSM5609001	sepsis	Immature B cell	0.721719
GSM5609001	sepsis	Memory B cell	0.0920235
GSM5609001	sepsis	Regulatory T cell	0.553387
GSM5609001	sepsis	T follicular helper cell	0.407829
GSM5609001	sepsis	Type 1 T helper cell	0.318101
GSM5609001	sepsis	Type 17 T helper cell	0
GSM5609001	sepsis	Type 2 T helper cell	0.0397122
GSM5609001	sepsis	Activated dendritic cell	0.625374
GSM5609001	sepsis	CD56bright natural killer cell	0.426997
GSM5609001	sepsis	CD56dim natural killer cell	0.350379
GSM5609001	sepsis	Eosinophil	0.368975
GSM5609001	sepsis	Immature dendritic cell	0.584186
GSM5609001	sepsis	Macrophage	0.521616
GSM5609001	sepsis	Mast cell	0.363289
GSM5609001	sepsis	MDSC	1
GSM5609001	sepsis	Monocyte	0.856884
GSM5609001	sepsis	Natural killer cell	0.3209
GSM5609001	sepsis	Natural killer T cell	0.320238
GSM5609001	sepsis	Neutrophil	0.953615
GSM5609001	sepsis	Plasmacytoid dendritic cell	0.757941
GSM5609002	sepsis	Activated B cell	0.638304
GSM5609002	sepsis	Activated CD4 T cell	0.308717
GSM5609002	sepsis	Activated CD8 T cell	0.807413
GSM5609002	sepsis	Central memory CD4 T cell	0.804208
GSM5609002	sepsis	Central memory CD8 T cell	0.506776
GSM5609002	sepsis	Effector memeory CD4 T cell	0.42872
GSM5609002	sepsis	Effector memeory CD8 T cell	0.786238
GSM5609002	sepsis	Gamma delta T cell	0.481144
GSM5609002	sepsis	Immature B cell	0.780431
GSM5609002	sepsis	Memory B cell	0.31459
GSM5609002	sepsis	Regulatory T cell	0.556231
GSM5609002	sepsis	T follicular helper cell	0.418415
GSM5609002	sepsis	Type 1 T helper cell	0.423461
GSM5609002	sepsis	Type 17 T helper cell	0
GSM5609002	sepsis	Type 2 T helper cell	0.0711632
GSM5609002	sepsis	Activated dendritic cell	0.738897
GSM5609002	sepsis	CD56bright natural killer cell	0.501946
GSM5609002	sepsis	CD56dim natural killer cell	0.478213
GSM5609002	sepsis	Eosinophil	0.404182
GSM5609002	sepsis	Immature dendritic cell	0.586864
GSM5609002	sepsis	Macrophage	0.614243
GSM5609002	sepsis	Mast cell	0.521987
GSM5609002	sepsis	MDSC	1
GSM5609002	sepsis	Monocyte	0.876176
GSM5609002	sepsis	Natural killer cell	0.3279
GSM5609002	sepsis	Natural killer T cell	0.34461
GSM5609002	sepsis	Neutrophil	0.966439
GSM5609002	sepsis	Plasmacytoid dendritic cell	0.79027
GSM5609003	sepsis	Activated B cell	0.643781
GSM5609003	sepsis	Activated CD4 T cell	0.362233
GSM5609003	sepsis	Activated CD8 T cell	0.747062
GSM5609003	sepsis	Central memory CD4 T cell	0.798508
GSM5609003	sepsis	Central memory CD8 T cell	0.4658
GSM5609003	sepsis	Effector memeory CD4 T cell	0.293426
GSM5609003	sepsis	Effector memeory CD8 T cell	0.721468
GSM5609003	sepsis	Gamma delta T cell	0.400016
GSM5609003	sepsis	Immature B cell	0.740944
GSM5609003	sepsis	Memory B cell	0.259612
GSM5609003	sepsis	Regulatory T cell	0.508553
GSM5609003	sepsis	T follicular helper cell	0.402726
GSM5609003	sepsis	Type 1 T helper cell	0.39302
GSM5609003	sepsis	Type 17 T helper cell	0
GSM5609003	sepsis	Type 2 T helper cell	0.0725658
GSM5609003	sepsis	Activated dendritic cell	0.696303
GSM5609003	sepsis	CD56bright natural killer cell	0.438103
GSM5609003	sepsis	CD56dim natural killer cell	0.43427
GSM5609003	sepsis	Eosinophil	0.289502
GSM5609003	sepsis	Immature dendritic cell	0.598375
GSM5609003	sepsis	Macrophage	0.574769
GSM5609003	sepsis	Mast cell	0.422976
GSM5609003	sepsis	MDSC	0.997062
GSM5609003	sepsis	Monocyte	0.828786
GSM5609003	sepsis	Natural killer cell	0.273597
GSM5609003	sepsis	Natural killer T cell	0.346968
GSM5609003	sepsis	Neutrophil	1
GSM5609003	sepsis	Plasmacytoid dendritic cell	0.785006
GSM5609004	sepsis	Activated B cell	0.410602
GSM5609004	sepsis	Activated CD4 T cell	0.26125
GSM5609004	sepsis	Activated CD8 T cell	0.765833
GSM5609004	sepsis	Central memory CD4 T cell	0.782087
GSM5609004	sepsis	Central memory CD8 T cell	0.483183
GSM5609004	sepsis	Effector memeory CD4 T cell	0.381532
GSM5609004	sepsis	Effector memeory CD8 T cell	0.778126
GSM5609004	sepsis	Gamma delta T cell	0.399064
GSM5609004	sepsis	Immature B cell	0.692512
GSM5609004	sepsis	Memory B cell	0.154849
GSM5609004	sepsis	Regulatory T cell	0.522764
GSM5609004	sepsis	T follicular helper cell	0.388238
GSM5609004	sepsis	Type 1 T helper cell	0.312723
GSM5609004	sepsis	Type 17 T helper cell	0
GSM5609004	sepsis	Type 2 T helper cell	0.00517762
GSM5609004	sepsis	Activated dendritic cell	0.674345
GSM5609004	sepsis	CD56bright natural killer cell	0.41117
GSM5609004	sepsis	CD56dim natural killer cell	0.482579
GSM5609004	sepsis	Eosinophil	0.281063
GSM5609004	sepsis	Immature dendritic cell	0.528771
GSM5609004	sepsis	Macrophage	0.555359
GSM5609004	sepsis	Mast cell	0.333906
GSM5609004	sepsis	MDSC	1
GSM5609004	sepsis	Monocyte	0.839249
GSM5609004	sepsis	Natural killer cell	0.320914
GSM5609004	sepsis	Natural killer T cell	0.26816
GSM5609004	sepsis	Neutrophil	0.9282
GSM5609004	sepsis	Plasmacytoid dendritic cell	0.73598
GSM5609005	sepsis	Activated B cell	0.473261
GSM5609005	sepsis	Activated CD4 T cell	0.342372
GSM5609005	sepsis	Activated CD8 T cell	0.700329
GSM5609005	sepsis	Central memory CD4 T cell	0.778259
GSM5609005	sepsis	Central memory CD8 T cell	0.474521
GSM5609005	sepsis	Effector memeory CD4 T cell	0.370297
GSM5609005	sepsis	Effector memeory CD8 T cell	0.706123
GSM5609005	sepsis	Gamma delta T cell	0.449269
GSM5609005	sepsis	Immature B cell	0.640662
GSM5609005	sepsis	Memory B cell	0.227117
GSM5609005	sepsis	Regulatory T cell	0.513009
GSM5609005	sepsis	T follicular helper cell	0.364847
GSM5609005	sepsis	Type 1 T helper cell	0.334441
GSM5609005	sepsis	Type 17 T helper cell	0
GSM5609005	sepsis	Type 2 T helper cell	0.047014
GSM5609005	sepsis	Activated dendritic cell	0.668767
GSM5609005	sepsis	CD56bright natural killer cell	0.403602
GSM5609005	sepsis	CD56dim natural killer cell	0.299344
GSM5609005	sepsis	Eosinophil	0.265534
GSM5609005	sepsis	Immature dendritic cell	0.56564
GSM5609005	sepsis	Macrophage	0.517551
GSM5609005	sepsis	Mast cell	0.427333
GSM5609005	sepsis	MDSC	0.96446
GSM5609005	sepsis	Monocyte	0.866822
GSM5609005	sepsis	Natural killer cell	0.350402
GSM5609005	sepsis	Natural killer T cell	0.364327
GSM5609005	sepsis	Neutrophil	1
GSM5609005	sepsis	Plasmacytoid dendritic cell	0.767909
GSM5609006	sepsis	Activated B cell	0.667953
GSM5609006	sepsis	Activated CD4 T cell	0.659526
GSM5609006	sepsis	Activated CD8 T cell	0.90709
GSM5609006	sepsis	Central memory CD4 T cell	0.837692
GSM5609006	sepsis	Central memory CD8 T cell	0.517262
GSM5609006	sepsis	Effector memeory CD4 T cell	0.437497
GSM5609006	sepsis	Effector memeory CD8 T cell	0.817557
GSM5609006	sepsis	Gamma delta T cell	0.522137
GSM5609006	sepsis	Immature B cell	0.824027
GSM5609006	sepsis	Memory B cell	0.345676
GSM5609006	sepsis	Regulatory T cell	0.566486
GSM5609006	sepsis	T follicular helper cell	0.400636
GSM5609006	sepsis	Type 1 T helper cell	0.396596
GSM5609006	sepsis	Type 17 T helper cell	0
GSM5609006	sepsis	Type 2 T helper cell	0.261688
GSM5609006	sepsis	Activated dendritic cell	0.602475
GSM5609006	sepsis	CD56bright natural killer cell	0.423919
GSM5609006	sepsis	CD56dim natural killer cell	0.436842
GSM5609006	sepsis	Eosinophil	0.220043
GSM5609006	sepsis	Immature dendritic cell	0.61846
GSM5609006	sepsis	Macrophage	0.537093
GSM5609006	sepsis	Mast cell	0.311967
GSM5609006	sepsis	MDSC	1
GSM5609006	sepsis	Monocyte	0.81248
GSM5609006	sepsis	Natural killer cell	0.346688
GSM5609006	sepsis	Natural killer T cell	0.321295
GSM5609006	sepsis	Neutrophil	0.767428
GSM5609006	sepsis	Plasmacytoid dendritic cell	0.772412
GSM5609007	sepsis	Activated B cell	0.734913
GSM5609007	sepsis	Activated CD4 T cell	0.56181
GSM5609007	sepsis	Activated CD8 T cell	0.883822
GSM5609007	sepsis	Central memory CD4 T cell	0.863949
GSM5609007	sepsis	Central memory CD8 T cell	0.539964
GSM5609007	sepsis	Effector memeory CD4 T cell	0.297425
GSM5609007	sepsis	Effector memeory CD8 T cell	0.817573
GSM5609007	sepsis	Gamma delta T cell	0.492485
GSM5609007	sepsis	Immature B cell	0.848142
GSM5609007	sepsis	Memory B cell	0.333918
GSM5609007	sepsis	Regulatory T cell	0.499787
GSM5609007	sepsis	T follicular helper cell	0.367001
GSM5609007	sepsis	Type 1 T helper cell	0.344738
GSM5609007	sepsis	Type 17 T helper cell	0
GSM5609007	sepsis	Type 2 T helper cell	0.171112
GSM5609007	sepsis	Activated dendritic cell	0.596044
GSM5609007	sepsis	CD56bright natural killer cell	0.437092
GSM5609007	sepsis	CD56dim natural killer cell	0.462397
GSM5609007	sepsis	Eosinophil	0.11453
GSM5609007	sepsis	Immature dendritic cell	0.580702
GSM5609007	sepsis	Macrophage	0.478602
GSM5609007	sepsis	Mast cell	0.268957
GSM5609007	sepsis	MDSC	1
GSM5609007	sepsis	Monocyte	0.796729
GSM5609007	sepsis	Natural killer cell	0.304558
GSM5609007	sepsis	Natural killer T cell	0.231281
GSM5609007	sepsis	Neutrophil	0.742695
GSM5609007	sepsis	Plasmacytoid dendritic cell	0.765403
GSM5609008	sepsis	Activated B cell	0.725838
GSM5609008	sepsis	Activated CD4 T cell	0.701174
GSM5609008	sepsis	Activated CD8 T cell	0.915824
GSM5609008	sepsis	Central memory CD4 T cell	0.863659
GSM5609008	sepsis	Central memory CD8 T cell	0.542238
GSM5609008	sepsis	Effector memeory CD4 T cell	0.452101
GSM5609008	sepsis	Effector memeory CD8 T cell	0.819063
GSM5609008	sepsis	Gamma delta T cell	0.547508
GSM5609008	sepsis	Immature B cell	0.881564
GSM5609008	sepsis	Memory B cell	0.404916
GSM5609008	sepsis	Regulatory T cell	0.569949
GSM5609008	sepsis	T follicular helper cell	0.421777
GSM5609008	sepsis	Type 1 T helper cell	0.403026
GSM5609008	sepsis	Type 17 T helper cell	0
GSM5609008	sepsis	Type 2 T helper cell	0.280345
GSM5609008	sepsis	Activated dendritic cell	0.60501
GSM5609008	sepsis	CD56bright natural killer cell	0.47962
GSM5609008	sepsis	CD56dim natural killer cell	0.468052
GSM5609008	sepsis	Eosinophil	0.234543
GSM5609008	sepsis	Immature dendritic cell	0.621536
GSM5609008	sepsis	Macrophage	0.529817
GSM5609008	sepsis	Mast cell	0.377641
GSM5609008	sepsis	MDSC	1
GSM5609008	sepsis	Monocyte	0.814908
GSM5609008	sepsis	Natural killer cell	0.360678
GSM5609008	sepsis	Natural killer T cell	0.335863
GSM5609008	sepsis	Neutrophil	0.74006
GSM5609008	sepsis	Plasmacytoid dendritic cell	0.775162
GSM5609009	sepsis	Activated B cell	0.619565
GSM5609009	sepsis	Activated CD4 T cell	0.642273
GSM5609009	sepsis	Activated CD8 T cell	0.878647
GSM5609009	sepsis	Central memory CD4 T cell	0.831633
GSM5609009	sepsis	Central memory CD8 T cell	0.451091
GSM5609009	sepsis	Effector memeory CD4 T cell	0.27984
GSM5609009	sepsis	Effector memeory CD8 T cell	0.766812
GSM5609009	sepsis	Gamma delta T cell	0.415571
GSM5609009	sepsis	Immature B cell	0.804602
GSM5609009	sepsis	Memory B cell	0.266913
GSM5609009	sepsis	Regulatory T cell	0.463269
GSM5609009	sepsis	T follicular helper cell	0.337538
GSM5609009	sepsis	Type 1 T helper cell	0.353822
GSM5609009	sepsis	Type 17 T helper cell	0
GSM5609009	sepsis	Type 2 T helper cell	0.214178
GSM5609009	sepsis	Activated dendritic cell	0.647393
GSM5609009	sepsis	CD56bright natural killer cell	0.442622
GSM5609009	sepsis	CD56dim natural killer cell	0.431525
GSM5609009	sepsis	Eosinophil	0.26023
GSM5609009	sepsis	Immature dendritic cell	0.582452
GSM5609009	sepsis	Macrophage	0.560619
GSM5609009	sepsis	Mast cell	0.389421
GSM5609009	sepsis	MDSC	1
GSM5609009	sepsis	Monocyte	0.750453
GSM5609009	sepsis	Natural killer cell	0.341314
GSM5609009	sepsis	Natural killer T cell	0.242279
GSM5609009	sepsis	Neutrophil	0.911877
GSM5609009	sepsis	Plasmacytoid dendritic cell	0.769674
GSM5609010	sepsis	Activated B cell	0.662606
GSM5609010	sepsis	Activated CD4 T cell	0.68166
GSM5609010	sepsis	Activated CD8 T cell	0.927919
GSM5609010	sepsis	Central memory CD4 T cell	0.901148
GSM5609010	sepsis	Central memory CD8 T cell	0.526544
GSM5609010	sepsis	Effector memeory CD4 T cell	0.418451
GSM5609010	sepsis	Effector memeory CD8 T cell	0.834126
GSM5609010	sepsis	Gamma delta T cell	0.564795
GSM5609010	sepsis	Immature B cell	0.821947
GSM5609010	sepsis	Memory B cell	0.272636
GSM5609010	sepsis	Regulatory T cell	0.526444
GSM5609010	sepsis	T follicular helper cell	0.403134
GSM5609010	sepsis	Type 1 T helper cell	0.41379
GSM5609010	sepsis	Type 17 T helper cell	0
GSM5609010	sepsis	Type 2 T helper cell	0.305441
GSM5609010	sepsis	Activated dendritic cell	0.568328
GSM5609010	sepsis	CD56bright natural killer cell	0.484406
GSM5609010	sepsis	CD56dim natural killer cell	0.413006
GSM5609010	sepsis	Eosinophil	0.243639
GSM5609010	sepsis	Immature dendritic cell	0.574434
GSM5609010	sepsis	Macrophage	0.46086
GSM5609010	sepsis	Mast cell	0.291318
GSM5609010	sepsis	MDSC	1
GSM5609010	sepsis	Monocyte	0.796485
GSM5609010	sepsis	Natural killer cell	0.307232
GSM5609010	sepsis	Natural killer T cell	0.370413
GSM5609010	sepsis	Neutrophil	0.739307
GSM5609010	sepsis	Plasmacytoid dendritic cell	0.770753
GSM5609011	sepsis	Activated B cell	0.661096
GSM5609011	sepsis	Activated CD4 T cell	0.332533
GSM5609011	sepsis	Activated CD8 T cell	0.746539
GSM5609011	sepsis	Central memory CD4 T cell	0.801072
GSM5609011	sepsis	Central memory CD8 T cell	0.453571
GSM5609011	sepsis	Effector memeory CD4 T cell	0.320535
GSM5609011	sepsis	Effector memeory CD8 T cell	0.739916
GSM5609011	sepsis	Gamma delta T cell	0.396853
GSM5609011	sepsis	Immature B cell	0.788777
GSM5609011	sepsis	Memory B cell	0.120593
GSM5609011	sepsis	Regulatory T cell	0.567814
GSM5609011	sepsis	T follicular helper cell	0.342679
GSM5609011	sepsis	Type 1 T helper cell	0.334482
GSM5609011	sepsis	Type 17 T helper cell	0
GSM5609011	sepsis	Type 2 T helper cell	0.0446041
GSM5609011	sepsis	Activated dendritic cell	0.649046
GSM5609011	sepsis	CD56bright natural killer cell	0.435278
GSM5609011	sepsis	CD56dim natural killer cell	0.469311
GSM5609011	sepsis	Eosinophil	0.217646
GSM5609011	sepsis	Immature dendritic cell	0.597825
GSM5609011	sepsis	Macrophage	0.534157
GSM5609011	sepsis	Mast cell	0.499893
GSM5609011	sepsis	MDSC	1
GSM5609011	sepsis	Monocyte	0.864078
GSM5609011	sepsis	Natural killer cell	0.295949
GSM5609011	sepsis	Natural killer T cell	0.265058
GSM5609011	sepsis	Neutrophil	0.997039
GSM5609011	sepsis	Plasmacytoid dendritic cell	0.791439
GSM5609012	sepsis	Activated B cell	0.712951
GSM5609012	sepsis	Activated CD4 T cell	0.737722
GSM5609012	sepsis	Activated CD8 T cell	0.934047
GSM5609012	sepsis	Central memory CD4 T cell	0.856184
GSM5609012	sepsis	Central memory CD8 T cell	0.520369
GSM5609012	sepsis	Effector memeory CD4 T cell	0.452402
GSM5609012	sepsis	Effector memeory CD8 T cell	0.812407
GSM5609012	sepsis	Gamma delta T cell	0.518445
GSM5609012	sepsis	Immature B cell	0.892907
GSM5609012	sepsis	Memory B cell	0.278518
GSM5609012	sepsis	Regulatory T cell	0.566553
GSM5609012	sepsis	T follicular helper cell	0.398033
GSM5609012	sepsis	Type 1 T helper cell	0.401223
GSM5609012	sepsis	Type 17 T helper cell	0
GSM5609012	sepsis	Type 2 T helper cell	0.269125
GSM5609012	sepsis	Activated dendritic cell	0.596461
GSM5609012	sepsis	CD56bright natural killer cell	0.46409
GSM5609012	sepsis	CD56dim natural killer cell	0.504728
GSM5609012	sepsis	Eosinophil	0.282722
GSM5609012	sepsis	Immature dendritic cell	0.631375
GSM5609012	sepsis	Macrophage	0.544028
GSM5609012	sepsis	Mast cell	0.319128
GSM5609012	sepsis	MDSC	1
GSM5609012	sepsis	Monocyte	0.803722
GSM5609012	sepsis	Natural killer cell	0.37663
GSM5609012	sepsis	Natural killer T cell	0.31871
GSM5609012	sepsis	Neutrophil	0.880191
GSM5609012	sepsis	Plasmacytoid dendritic cell	0.799148
GSM5609013	sepsis	Activated B cell	0.323421
GSM5609013	sepsis	Activated CD4 T cell	0.315537
GSM5609013	sepsis	Activated CD8 T cell	0.715176
GSM5609013	sepsis	Central memory CD4 T cell	0.780645
GSM5609013	sepsis	Central memory CD8 T cell	0.416402
GSM5609013	sepsis	Effector memeory CD4 T cell	0.318007
GSM5609013	sepsis	Effector memeory CD8 T cell	0.716255
GSM5609013	sepsis	Gamma delta T cell	0.466131
GSM5609013	sepsis	Immature B cell	0.671134
GSM5609013	sepsis	Memory B cell	0.287747
GSM5609013	sepsis	Regulatory T cell	0.525359
GSM5609013	sepsis	T follicular helper cell	0.344532
GSM5609013	sepsis	Type 1 T helper cell	0.310324
GSM5609013	sepsis	Type 17 T helper cell	0
GSM5609013	sepsis	Type 2 T helper cell	0.0989897
GSM5609013	sepsis	Activated dendritic cell	0.632069
GSM5609013	sepsis	CD56bright natural killer cell	0.422346
GSM5609013	sepsis	CD56dim natural killer cell	0.416871
GSM5609013	sepsis	Eosinophil	0.289846
GSM5609013	sepsis	Immature dendritic cell	0.588777
GSM5609013	sepsis	Macrophage	0.537641
GSM5609013	sepsis	Mast cell	0.450625
GSM5609013	sepsis	MDSC	0.984418
GSM5609013	sepsis	Monocyte	0.853412
GSM5609013	sepsis	Natural killer cell	0.333898
GSM5609013	sepsis	Natural killer T cell	0.268471
GSM5609013	sepsis	Neutrophil	1
GSM5609013	sepsis	Plasmacytoid dendritic cell	0.726903
GSM5609014	sepsis	Activated B cell	0.588402
GSM5609014	sepsis	Activated CD4 T cell	0.349765
GSM5609014	sepsis	Activated CD8 T cell	0.774567
GSM5609014	sepsis	Central memory CD4 T cell	0.792007
GSM5609014	sepsis	Central memory CD8 T cell	0.483451
GSM5609014	sepsis	Effector memeory CD4 T cell	0.292583
GSM5609014	sepsis	Effector memeory CD8 T cell	0.762137
GSM5609014	sepsis	Gamma delta T cell	0.413357
GSM5609014	sepsis	Immature B cell	0.788545
GSM5609014	sepsis	Memory B cell	0.182953
GSM5609014	sepsis	Regulatory T cell	0.571229
GSM5609014	sepsis	T follicular helper cell	0.393098
GSM5609014	sepsis	Type 1 T helper cell	0.327982
GSM5609014	sepsis	Type 17 T helper cell	0
GSM5609014	sepsis	Type 2 T helper cell	0.0172267
GSM5609014	sepsis	Activated dendritic cell	0.589048
GSM5609014	sepsis	CD56bright natural killer cell	0.458086
GSM5609014	sepsis	CD56dim natural killer cell	0.404473
GSM5609014	sepsis	Eosinophil	0.248019
GSM5609014	sepsis	Immature dendritic cell	0.57174
GSM5609014	sepsis	Macrophage	0.566475
GSM5609014	sepsis	Mast cell	0.373473
GSM5609014	sepsis	MDSC	1
GSM5609014	sepsis	Monocyte	0.851405
GSM5609014	sepsis	Natural killer cell	0.314745
GSM5609014	sepsis	Natural killer T cell	0.24697
GSM5609014	sepsis	Neutrophil	0.955176
GSM5609014	sepsis	Plasmacytoid dendritic cell	0.74809
GSM5609015	sepsis	Activated B cell	0.408788
GSM5609015	sepsis	Activated CD4 T cell	0.196204
GSM5609015	sepsis	Activated CD8 T cell	0.672179
GSM5609015	sepsis	Central memory CD4 T cell	0.774492
GSM5609015	sepsis	Central memory CD8 T cell	0.437042
GSM5609015	sepsis	Effector memeory CD4 T cell	0.297089
GSM5609015	sepsis	Effector memeory CD8 T cell	0.704945
GSM5609015	sepsis	Gamma delta T cell	0.491539
GSM5609015	sepsis	Immature B cell	0.67142
GSM5609015	sepsis	Memory B cell	0.182968
GSM5609015	sepsis	Regulatory T cell	0.597958
GSM5609015	sepsis	T follicular helper cell	0.347974
GSM5609015	sepsis	Type 1 T helper cell	0.335838
GSM5609015	sepsis	Type 17 T helper cell	0.0578051
GSM5609015	sepsis	Type 2 T helper cell	0
GSM5609015	sepsis	Activated dendritic cell	0.681402
GSM5609015	sepsis	CD56bright natural killer cell	0.424594
GSM5609015	sepsis	CD56dim natural killer cell	0.397538
GSM5609015	sepsis	Eosinophil	0.303914
GSM5609015	sepsis	Immature dendritic cell	0.536186
GSM5609015	sepsis	Macrophage	0.532552
GSM5609015	sepsis	Mast cell	0.442929
GSM5609015	sepsis	MDSC	0.967164
GSM5609015	sepsis	Monocyte	0.80473
GSM5609015	sepsis	Natural killer cell	0.292167
GSM5609015	sepsis	Natural killer T cell	0.264958
GSM5609015	sepsis	Neutrophil	1
GSM5609015	sepsis	Plasmacytoid dendritic cell	0.729718
GSM5609016	sepsis	Activated B cell	0.636979
GSM5609016	sepsis	Activated CD4 T cell	0.498811
GSM5609016	sepsis	Activated CD8 T cell	0.784924
GSM5609016	sepsis	Central memory CD4 T cell	0.807504
GSM5609016	sepsis	Central memory CD8 T cell	0.474459
GSM5609016	sepsis	Effector memeory CD4 T cell	0.347341
GSM5609016	sepsis	Effector memeory CD8 T cell	0.764789
GSM5609016	sepsis	Gamma delta T cell	0.487739
GSM5609016	sepsis	Immature B cell	0.797785
GSM5609016	sepsis	Memory B cell	0.290479
GSM5609016	sepsis	Regulatory T cell	0.524999
GSM5609016	sepsis	T follicular helper cell	0.377485
GSM5609016	sepsis	Type 1 T helper cell	0.352697
GSM5609016	sepsis	Type 17 T helper cell	0.0885449
GSM5609016	sepsis	Type 2 T helper cell	0
GSM5609016	sepsis	Activated dendritic cell	0.678425
GSM5609016	sepsis	CD56bright natural killer cell	0.461017
GSM5609016	sepsis	CD56dim natural killer cell	0.381502
GSM5609016	sepsis	Eosinophil	0.291651
GSM5609016	sepsis	Immature dendritic cell	0.600862
GSM5609016	sepsis	Macrophage	0.638671
GSM5609016	sepsis	Mast cell	0.533001
GSM5609016	sepsis	MDSC	1
GSM5609016	sepsis	Monocyte	0.815906
GSM5609016	sepsis	Natural killer cell	0.327542
GSM5609016	sepsis	Natural killer T cell	0.304625
GSM5609016	sepsis	Neutrophil	0.976996
GSM5609016	sepsis	Plasmacytoid dendritic cell	0.77704
GSM5609017	sepsis	Activated B cell	0.507356
GSM5609017	sepsis	Activated CD4 T cell	0.42762
GSM5609017	sepsis	Activated CD8 T cell	0.820378
GSM5609017	sepsis	Central memory CD4 T cell	0.794809
GSM5609017	sepsis	Central memory CD8 T cell	0.479051
GSM5609017	sepsis	Effector memeory CD4 T cell	0.328114
GSM5609017	sepsis	Effector memeory CD8 T cell	0.774716
GSM5609017	sepsis	Gamma delta T cell	0.474509
GSM5609017	sepsis	Immature B cell	0.755639
GSM5609017	sepsis	Memory B cell	0.123185
[truncated: 8,978 more rows]
